# Supplementary material for: GWAS of Active Music Engagement Frequency in the Canadian Longitudinal Study on Aging
Source: Research Square preprint supplement (doi:10.21203/rs.3.rs-8108581/v1), 2026-01-23
Supplement: Supplementary file 2 [file a9aba506f8047db06905d834.xlsx]

## Sheet: AppendixA-ST1_LDSC_results
study_name	trait	category	N_GWAS	h2_trait1	h2_se_trait1	h2_trait2	h2_se_trait2	rg	rg_se	Z	pval	FDR_P_value	PMID
Davies et al., 2018	General cognition	cognition and language	300486	0.0448	0.0185	0.138	0.0053	0.3899	0.0986	3.9539	7.69e-05	0.0012	29844566
Eising et al., 2022	Language (multivariate)	cognition and language	27180	0.0458	0.0188	0.294	0.0212	0.6823	0.1828	3.7318	0.0002	0.0016	35998220
Jones et al., 2021	Hand muscle weakness	motor	254894	0.0457	0.0188	0.0432	0.003	0.0902	0.1222	0.7384	0.4603	0.68388	33510174
de la Fuente et al., 2021	Reaction time	motor	330024	0.0457	0.0188	0.0742	0.0029	0.0361	0.0931	0.3879	0.6981	0.761564	32895543
Timmins et al., 2020	Walking pace	motor	450967	0.0456	0.0188	0.0519	0.0021	0.1817	0.0921	1.9733	0.0485	0.291	33128006
Niarchou et al.,2022	Beat synchronization	musicality	606825	0.0449	0.0199	0.0516	0.0018	0.5807	0.1519	3.8232	0.0001	0.0012	35710621
Wightman et al., 2021	Alzheimer's disease	neurodegenerative and aging	762917	0.0413	0.02	0.0092	0.0074	-0.4589	0.2885	-1.5907	0.1117	0.3636	34493870
Nicolas et al., 2018	ALS	neurodegenerative and aging	80610	0.044	0.0187	0.0322	0.0072	-0.1304	0.2264	-0.5762	0.5645	0.68388	29566793
Ben-Avraham et al., 2017	Gait speed	neurodegenerative and aging	31478	0.0445	0.0195	0.0468	0.0146	0.1657	0.2695	0.6149	0.5386	0.68388	28077804
Jiang et al., 2021	Multiple sclerosis	neurodegenerative and aging	456348	0.0442	0.0192	0.0006	0.001	-0.4122	0.7254	-0.5683	0.5699	0.68388	34737426
Rosoff et al., 2023	Multivariate aging	neurodegenerative and aging	1958774	0.0361	0.0197	0.0138	0.0005	0.1641	0.1064	1.5426	0.1229	0.3636	37550455
Nalls et al., 2019	Parkinson's disease	neurodegenerative and aging	482730	0.0464	0.0194	0.0166	0.0017	0.0704	0.1193	0.5899	0.5552	0.68388	31701892
Sanchez-Roige et al., 2019	Alcohol use disorder	psychiatric	121604	0.0398	0.0191	0.0178	0.0017	-0.2089	0.1557	-1.3415	0.1798	0.3636	29058377
Johnson et al., 2020	Cannabis use disorder	psychiatric	357806	0.0398	0.0191	0.0178	0.0017	-0.2089	0.1557	-1.3415	0.1798	0.3636	33096046
Demontis et al., 2023	ADHD	psychiatric	225534	0.0388	0.0204	0.0935	0.0044	0.0068	0.1074	0.0635	0.9494	0.9494	36702997
Grove et al., 2019	ASD	psychiatric	46350	0.0389	0.0212	0.1941	0.0165	0.2514	0.1704	1.4754	0.1401	0.3636	30804558
Hill et al., 2020	Anxiety	psychiatric	270059	0.0448	0.0185	0.0574	0.0032	0.1812	0.1297	1.3974	0.1623	0.3636	30867560
Mullins et al., 2021	Bipolar disorder	psychiatric	413466	0.0427	0.0195	0.0714	0.0027	0.1473	0.1038	1.4188	0.156	0.3636	34002096
Arnold et al., 2017	OCD	psychiatric	9725	0.036	0.0186	0.3255	0.0503	0.138	0.2129	0.6481	0.5169	0.68388	28761083
Duncan et al., 2017	PTSD	psychiatric	174494	0.0397	0.02	0.0169	0.0028	-0.0737	0.219	-0.3366	0.7364	0.768417	28439101
Pardiñas et al., 2018	Schizophrenia	psychiatric	130644	0.0374	0.0185	0.3639	0.0137	0.1329	0.0995	1.3353	0.1818	0.3636	29483656
Watson et al., 2019	Eating disorder	psychiatric	72517	0.0415	0.0213	0.1795	0.0123	0.1405	0.1202	1.1688	0.2425	0.447692	31308545
Wray et al., 2018	Major depression	psychiatric	142646	0.0441	0.0184	0.0728	0.0046	-0.0445	0.1128	-0.3941	0.6935	0.761564	29700475
Yu et al., 2019	Tourette's syndrome	psychiatric	14307	0.0451	0.0197	0.3537	0.0421	0.1003	0.1708	0.5876	0.5568	0.68388	30818990

## Sheet: AppendixA-ST2
construct	variable	naming_convention_clsa	transformation applied	category	rg_variance	rg_se	lower_ci	upper_ci	logL	n	h2_tr1	h2_tr1_se	h2_tr2	h2_tr2_se	z_score	p_value	fdr_corrected_p_value	questionnaire citations
processing speed (or psychomotor speed)	Reaction time (ms)	CRT_MRTWOUT_CORRANS_COM	log transformation	cognition and language	-0.355882	0.13621	-0.622854	-0.0889104	11325.5	40321	0.108927	0.01834	0.086186	0.018872	-2.61275	0.00898183	0.0179637	Gallacher, J., Collins, R., Elliott, P., Palmer, S., Burton, P., Mitchell, C., … Lyons, R. (2013). A platform for the remote conduct of gene-environment interaction studies. PLoS One, 8, e54331. doi: 10.1371/journal.pone.0054331
executive functioning	Stroop (s)	STP_COLTIME_SS_COM	log transformation	cognition and language	-0.625061	0.100833	-0.822694	-0.427428	4876.32	40351	0.09	0.018185	0.239049	0.018838	-6.19897	5.68e-10	1.25e-08	[1] Troyer, A.K., Leach, L. & Strauss, E. (2006). Aging and Response Inhibition: Normative Data for the Victoria Stroop Test. Aging, Neuropsychology, and Cognition, 13(1), 20-35, DOI: 10.1080/138255890968187 [2] Bayard, S., Erkes, J., Moroni, C. & CPCN-LR (2011). Victoria Stroop Test: normative data in a sample group of older people and the study of their clinical applications in the assessment o…
verbal category fluency	Animal fluency	COG_AFT_SCORE_1_COM and COG_AFT_SCORE_2_COM	average of two scorings of Animal fluence task variables	cognition and language	0.440553	0.092076	0.260084	0.621022	-55855.1	40042	0.091783	0.018398	0.286531	0.019758	4.78467	1.71e-06	7.54e-06	Read, D. E. (1987). Neuropsychological assessment of memory in the elderly. Canadian Journal of Psychology, 41, 158–174.
phonological fluency or knowledge	Verbal fluency (COWAT)	FAS_F_SCORE_COM, FAS_A_SCORE_COM, FAS_S_SCORE_COM	average of F,A,S, words scores from the Controlled Oral Word Association Task (COWAT)	cognition and language	0.45485	0.086472	0.285365	0.624335	-49365.3	39888	0.09061	0.018474	0.317483	0.019875	5.26008	1.44e-07	1.06e-06	Lezak, M. D., Howieson, D. B., & Loring, D. W. (2004). Neuropsychological assessment (4th ed.). New York, NY: Oxford University Press
memory immediate	Immediate Recall	COG_REYI_SCORE_COM	n/a	cognition and language	0.423934	0.107495	0.213244	0.634624	-32584.1	39845	0.095746	0.018473	0.178073	0.019066	3.94376	8.02e-05	0.000294123	Rey, A. (1964). L’examen clinique en psychologie. Paris: Presses universitaire de France.
memory delayed	Delayed Recall	COG_REYII_SCORE_COM	n/a	cognition and language	0.337233	0.122723	0.0966959	0.57777	-34991.7	39833	0.104215	0.018382	0.118265	0.019529	2.74792	0.00599746	0.0131944	Rey, A. (1964). L’examen clinique en psychologie. Paris: Presses universitaire de France.
mental flexibility and processing speed	Mental Alternation	COG_MAT_SCORE_COM	n/a	cognition and language	0.482131	0.095878	0.29421	0.670052	-62325.9	39539	0.096146	0.018301	0.25966	0.020585	5.02859	4.94e-07	2.72e-06	Teng, E. (1995). The Mental Alternations Test (MAT). The Clinical Neuropsychologist, 9(3), 287
mobility	Timed up and go (s)	TUG_TIME_COM	log transformation	motor	-0.330274	0.180375	-0.683809	0.023261	12442	40342	0.105997	0.018342	0.052047	0.018402	-1.83104	0.0670944	0.0984052
balance	Balance (s)	BAL_BEST_COM	n/a	motor	0.388588	0.169835	0.0557114	0.721465	-79465.7	39611	0.105463	0.018364	0.060795	0.018822	2.28803	0.0221356	0.0374603
neuromuscular strength	Max grip strength (kg)	GS_EXAM_AVG_COM	n/a	motor	0.103654	0.089452	-0.0716719	0.27898	-58155.3	39078	0.107409	0.018375	0.233793	0.021127	1.15877	0.246551	0.319066
gaits speed	4m Walk (s)	WLK_TIME_COM	log transformation	motor	-0.481391	0.167208	-0.809119	-0.153663	14214.6	40366	0.107268	0.018262	0.060783	0.018105	-2.879	0.00398945	0.00975198
physical activity	Physical Activity Scale for the Elderly (PASE)	PA2_WALK_MCQ, PA2_LSPRT_MCQ, PA2_MSPRT_MCQ, PA2_SSPRT_MCQ, PA2_EXER_MCQ	log transformation of the sum of 5 variables from the PASE scale, participants with any NA were excluded	lifestyle	0.123551	0.189638	-0.248139	0.495241	-8103	40508	0.106378	0.018382	0.043289	0.017976	0.65151	0.514718	0.539228	Washburn R.A., Smith K.W., Jette A.M., & Janney C.A. (1993). The Physical Activity Scale for the Elderly (PASE): development and evaluation. J Clin Epidemiol. 46(2):153-62. doi: 10.1016/0895-4356(93)90053-4. PMID: 8437031.
depressive symptoms	Depressive symptoms (CESD-10)	DEP_CESD10_COM	square root transformation	psychiatric	-0.096648	0.14185	-0.374674	0.181378	-23230.4	40422	0.10699	0.018377	0.080902	0.019045	-0.681339	0.495657	0.539228	Williams M.W., Li C.Y., & Hay C.C. (2020). Validation of the 10-item Center for Epidemiologic Studies Depression Scale Post Stroke. J Stroke Cerebrovasc Dis. 29(12):105334. doi: 10.1016/j.jstrokecerebrovasdis.2020.105334. Epub 2020 Sep 28. PMID: 32992164; PMCID: PMC7686250.
psychological distress	Psychological distress (K10)	K10_DSCORE_MCQ	square root transformation	psychiatric	-0.484226	0.13365	-0.74618	-0.222272	-9697.48	39483	0.094266	0.018358	0.131273	0.018896	-3.62309	0.000291104	0.000800537	Kessler, R.C., Barker, P.R., Colpe, L.J., Epstein, J.F., Gfroerer, J.C., Hiripi, E., Howes, M.J, Normand, S-L.T., Manderscheid, R.W., Walters, E.E., Zaslavsky, A.M. (2003). Screening for serious mental illness in the general population. Archives of General Psychiatry, 60(2), 184-189, DOI:10.1001/archpsyc.60.2.184
clinical depression	Clinical depression	DPR_CLINDEP_COM	case/control	psychiatric	0.086713	0.132659	-0.173299	0.346725	-1842.31	40421	0.107873	0.018397	0.090147	0.018545	0.653653	0.513335	0.539228
mood disorder	Mood disorder	CCC_MOOD_COM	case/control	psychiatric	0.373245	0.155551	0.068365	0.678125	-2279.48	40445	0.108165	0.018333	0.070328	0.018546	2.3995	0.0164174	0.0300985
anxiety disorder	Anxiety disorder	CCC_ANXI_COM	case/control	psychiatric	-0.089071	0.196984	-0.47516	0.297018	3512.14	40436	0.105514	0.01842	0.041388	0.017606	-0.452174	0.651144	0.651144
religious outing	Religious outing	SPA_CHRCH_COM	higeher=more social engagement	lifestyle	0.388602	0.100842	0.190952	0.586252	-25260.7	40470	0.105469	0.018344	0.15066	0.019171	3.85357	0.000116407	0.000365849
volunteer outing	Volunteer outing	SPA_VOLUN_COM	higeher=more social engagement	lifestyle	0.801921	0.142668	0.522292	1.08155	-24946.1	40475	0.084146	0.018314	0.122497	0.017265	5.62089	1.9e-08	2.09e-07
social outing	Social outing	SPA_OUTS_COM	higeher=more social engagement	lifestyle	0.224045	0.164221	-0.0978282	0.545918	-15036.6	40482	0.104729	0.01842	0.060956	0.017909	1.36429	0.172476	0.237155
alcohol use	Alcohol use	ALC_FREQ_COM	higher = greater frequency of alcohol use	lifestyle	-0.10493	0.124924	-0.349781	0.139921	-38316.3	40103	0.105933	0.018391	0.11153	0.01949	-0.839951	0.400936	0.490033
current smoker status	Current smoker	SMK_CURRCG_COM_binary	binarized to case=smoker, control=non-smoker	lifestyle	-0.537273	0.253249	-1.03364	-0.040905	-3365.94	34237	0.10414	0.018323	0.044807	0.024008	-2.12152	0.033878	0.0532369

## Sheet: AppendixA-ST3_GenomicRiskLoci
GenomicLocus	uniqID	rsID	chr	pos	p	start	end	nSNPs	nGWASSNPs	nIndSigSNPs	IndSigSNPs	nLeadSNPs	LeadSNPs
1	1:85880933:A:G	rs7554669	1	85880933	9.2e-08	85855098	85898330	3	3	1	rs7554669	1	rs7554669
2	1:168930460:C:T	rs12729624	1	168930460	2.25e-06	168903184	168979764	35	33	2	rs12729624;rs10800400	1	rs12729624
3	1:235439317:C:T	rs114029967	1	235439317	2.52e-06	235389777	235466742	7	6	1	rs114029967	1	rs114029967
4	3:3687572:C:G	rs116481454	3	3687572	5.74e-06	3678700	3690695	6	6	1	rs116481454	1	rs116481454
5	3:16537969:C:T	rs115067899	3	16537969	5.96e-06	16537969	16645881	3	3	1	rs115067899	1	rs115067899
6	3:73182547:A:G	rs9647401	3	73182547	2.79e-07	73169286	73213062	30	26	1	rs9647401	1	rs9647401
7	5:55766621:C:G	rs16885512	5	55766621	2.52e-06	55765634	55766621	2	2	2	rs16885512;rs13155342	1	rs16885512
8	5:103551497:C:T	rs10044788	5	103551497	9.61e-07	103363305	103669565	33	28	1	rs10044788	1	rs10044788
9	5:172195092:A:G	rs3805476	5	172195092	4.35e-07	172195092	172218380	19	16	2	rs3805476;rs12520750	1	rs3805476
10	6:541668:C:T	rs6904638	6	541668	7.44e-06	528736	544239	4	4	1	rs6904638	1	rs6904638
11	6:67242496:C:T	rs2765233	6	67242496	9.98e-06	67192661	67247455	129	113	1	rs2765233	1	rs2765233
12	7:31685507:A:C	rs113114385	7	31685507	9.25e-06	31685507	31685507	1	1	1	rs113114385	1	rs113114385
13	9:114591558:A:G	rs143824048	9	114591558	6.06e-06	114435160	114662006	4	2	2	rs143824048;rs189639877	1	rs143824048
14	13:66534731:C:T	rs80055245	13	66534731	9.3e-07	66457996	67412175	17	16	3	rs80055245;rs143491204;rs368594581	1	rs80055245
15	14:26668335:A:T	rs79292477	14	26668335	1.53e-06	26665745	26682550	9	8	1	rs79292477	1	rs79292477
16	14:33367794:A:T	rs10145529	14	33367794	8.53e-06	33367794	33367794	1	1	1	rs10145529	1	rs10145529
17	15:86003010:A:G	rs4572341	15	86003010	7.34e-06	85996416	86015439	7	3	1	rs4572341	1	rs4572341
18	18:64674501:A:G	rs117450000	18	64674501	4.24e-06	64280117	64674501	10	7	2	rs117450000;rs79984625	1	rs117450000
19	20:45607859:A:C	rs6124907	20	45607859	3.25e-06	45607859	45607859	1	1	1	rs6124907	1	rs6124907
20	23:25712567:G:T	rs5986261	23	25712567	3.06e-06	25712567	25716955	2	2	1	rs5986261	1	rs5986261
21	23:87002770:A:G	rs5924107	23	87002770	5.81e-06	86952348	87325873	96	77	1	rs5924107	1	rs5924107

## Sheet: AppendixA-ST4_leadSNPs
No	GenomicLocus	uniqID	rsID	chr	pos	p	nIndSigSNPs	IndSigSNPs
1	1	1:85880933:A:G	rs7554669	1	85880933	9.2e-08	1	rs7554669
2	2	1:168930460:C:T	rs12729624	1	168930460	2.25e-06	2	rs12729624;rs10800400
3	3	1:235439317:C:T	rs114029967	1	235439317	2.52e-06	1	rs114029967
4	4	3:3687572:C:G	rs116481454	3	3687572	5.74e-06	1	rs116481454
5	5	3:16537969:C:T	rs115067899	3	16537969	5.96e-06	1	rs115067899
6	6	3:73182547:A:G	rs9647401	3	73182547	2.79e-07	1	rs9647401
7	7	5:55766621:C:G	rs16885512	5	55766621	2.52e-06	2	rs16885512;rs13155342
8	8	5:103551497:C:T	rs10044788	5	103551497	9.61e-07	1	rs10044788
9	9	5:172195092:A:G	rs3805476	5	172195092	4.35e-07	2	rs3805476;rs12520750
10	10	6:541668:C:T	rs6904638	6	541668	7.44e-06	1	rs6904638
11	11	6:67242496:C:T	rs2765233	6	67242496	9.98e-06	1	rs2765233
12	12	7:31685507:A:C	rs113114385	7	31685507	9.25e-06	1	rs113114385
13	13	9:114591558:A:G	rs143824048	9	114591558	6.06e-06	2	rs143824048;rs189639877
14	14	13:66534731:C:T	rs80055245	13	66534731	9.3e-07	3	rs80055245;rs143491204;rs368594581
15	15	14:26668335:A:T	rs79292477	14	26668335	1.53e-06	1	rs79292477
16	16	14:33367794:A:T	rs10145529	14	33367794	8.53e-06	1	rs10145529
17	17	15:86003010:A:G	rs4572341	15	86003010	7.34e-06	1	rs4572341
18	18	18:64674501:A:G	rs117450000	18	64674501	4.24e-06	2	rs117450000;rs79984625
19	19	20:45607859:A:C	rs6124907	20	45607859	3.25e-06	1	rs6124907
20	20	23:25712567:G:T	rs5986261	23	25712567	3.06e-06	1	rs5986261
21	21	23:87002770:A:G	rs5924107	23	87002770	5.81e-06	1	rs5924107

## Sheet: AppendixA-ST5_IndSigSNPs
No	GenomicLocus	uniqID	rsID	chr	pos	p	nSNPs	nGWASSNPs
1	1	1:85880933:A:G	rs7554669	1	85880933	9.2e-08	3	3
2	2	1:168930460:C:T	rs12729624	1	168930460	2.25e-06	28	26
3	2	1:168958617:G:T	rs10800400	1	168958617	9.1e-06	30	29
4	3	1:235439317:C:T	rs114029967	1	235439317	2.52e-06	7	6
5	4	3:3687572:C:G	rs116481454	3	3687572	5.74e-06	6	6
6	5	3:16537969:C:T	rs115067899	3	16537969	5.96e-06	3	3
7	6	3:73182547:A:G	rs9647401	3	73182547	2.79e-07	30	26
8	7	5:55765634:C:T	rs13155342	5	55765634	9.47e-06	1	1
9	7	5:55766621:C:G	rs16885512	5	55766621	2.52e-06	1	1
10	8	5:103551497:C:T	rs10044788	5	103551497	9.61e-07	33	28
11	9	5:172195092:A:G	rs3805476	5	172195092	4.35e-07	14	11
12	9	5:172213922:A:G	rs12520750	5	172213922	6.1e-07	16	14
13	10	6:541668:C:T	rs6904638	6	541668	7.44e-06	4	4
14	11	6:67242496:C:T	rs2765233	6	67242496	9.98e-06	129	113
15	12	7:31685507:A:C	rs113114385	7	31685507	9.25e-06	1	1
16	13	9:114435160:G:T	rs189639877	9	114435160	7.53e-06	3	1
17	13	9:114591558:A:G	rs143824048	9	114591558	6.06e-06	2	1
18	14	13:66534731:C:T	rs80055245	13	66534731	9.3e-07	12	11
19	14	13:66768308:A:G	rs143491204	13	66768308	9.82e-06	1	1
20	14	13:67312169:A:G	rs368594581	13	67312169	1.07e-06	4	4
21	15	14:26668335:A:T	rs79292477	14	26668335	1.53e-06	9	8
22	16	14:33367794:A:T	rs10145529	14	33367794	8.53e-06	1	1
23	17	15:86003010:A:G	rs4572341	15	86003010	7.34e-06	7	3
24	18	18:64481666:C:T	rs79984625	18	64481666	9.1e-06	9	6
25	18	18:64674501:A:G	rs117450000	18	64674501	4.24e-06	2	2
26	19	20:45607859:A:C	rs6124907	20	45607859	3.25e-06	1	1
27	20	23:25712567:G:T	rs5986261	23	25712567	3.06e-06	2	2
28	21	23:87002770:A:G	rs5924107	23	87002770	5.81e-06	96	77

## Sheet: AppendixA-ST6_annov
uniqID	gene	annot	dist	exonic_func	exon	symbol	chr	pos
1:85855098:A:T	ENSG00000223653	ncRNA_intronic	0	NA	NA	RP11-131L23.1	1	85855098
1:85880933:A:G	ENSG00000223653	ncRNA_intronic	0	NA	NA	RP11-131L23.1	1	85880933
1:85898330:A:G	ENSG00000223653	ncRNA_intronic	0	NA	NA	RP11-131L23.1	1	85898330
1:168903184:A:G	ENSG00000203601	ncRNA_intronic	0	NA	NA	LINC00970	1	168903184
1:168915077:A:G	ENSG00000203601	ncRNA_intronic	0	NA	NA	LINC00970	1	168915077
1:168916337:C:T	ENSG00000203601	ncRNA_intronic	0	NA	NA	LINC00970	1	168916337
1:168930460:C:T	ENSG00000203601	ncRNA_intronic	0	NA	NA	LINC00970	1	168930460
1:168933787:C:T	ENSG00000203601	ncRNA_intronic	0	NA	NA	LINC00970	1	168933787
1:168939789:A:G	ENSG00000203601	ncRNA_intronic	0	NA	NA	LINC00970	1	168939789
1:168940355:C:T	ENSG00000203601	ncRNA_intronic	0	NA	NA	LINC00970	1	168940355
1:168942529:C:T	ENSG00000203601	ncRNA_intronic	0	NA	NA	LINC00970	1	168942529
1:168944014:A:C	ENSG00000203601	ncRNA_intronic	0	NA	NA	LINC00970	1	168944014
1:168944894:A:G	ENSG00000203601	ncRNA_intronic	0	NA	NA	LINC00970	1	168944894
1:168945225:G:T	ENSG00000203601	ncRNA_intronic	0	NA	NA	LINC00970	1	168945225
1:168947439:A:AT	ENSG00000203601	ncRNA_intronic	0	NA	NA	LINC00970	1	168947439
1:168949222:C:T	ENSG00000203601	ncRNA_intronic	0	NA	NA	LINC00970	1	168949222
1:168949459:C:T	ENSG00000203601	ncRNA_intronic	0	NA	NA	LINC00970	1	168949459
1:168950508:G:T	ENSG00000203601	ncRNA_intronic	0	NA	NA	LINC00970	1	168950508
1:168951018:G:GA	ENSG00000203601	ncRNA_intronic	0	NA	NA	LINC00970	1	168951018
1:168951444:C:G	ENSG00000203601	ncRNA_intronic	0	NA	NA	LINC00970	1	168951444
1:168952062:A:C	ENSG00000203601	ncRNA_intronic	0	NA	NA	LINC00970	1	168952062
1:168952534:A:G	ENSG00000203601	ncRNA_intronic	0	NA	NA	LINC00970	1	168952534
1:168953088:A:G	ENSG00000203601	ncRNA_intronic	0	NA	NA	LINC00970	1	168953088
1:168954614:C:T	ENSG00000203601	ncRNA_intronic	0	NA	NA	LINC00970	1	168954614
1:168954806:A:G	ENSG00000203601	ncRNA_intronic	0	NA	NA	LINC00970	1	168954806
1:168957080:A:G	ENSG00000203601	ncRNA_intronic	0	NA	NA	LINC00970	1	168957080
1:168958617:G:T	ENSG00000203601	ncRNA_intronic	0	NA	NA	LINC00970	1	168958617
1:168959011:C:T	ENSG00000203601	ncRNA_intronic	0	NA	NA	LINC00970	1	168959011
1:168959049:A:G	ENSG00000203601	ncRNA_intronic	0	NA	NA	LINC00970	1	168959049
1:168959055:A:T	ENSG00000203601	ncRNA_intronic	0	NA	NA	LINC00970	1	168959055
1:168962922:C:T	ENSG00000203601	ncRNA_intronic	0	NA	NA	LINC00970	1	168962922
1:168965252:G:T	ENSG00000203601	ncRNA_intronic	0	NA	NA	LINC00970	1	168965252
1:168967723:A:C	ENSG00000203601	ncRNA_intronic	0	NA	NA	LINC00970	1	168967723
1:168969833:C:T	ENSG00000203601	ncRNA_intronic	0	NA	NA	LINC00970	1	168969833
1:168973635:C:T	ENSG00000203601	ncRNA_intronic	0	NA	NA	LINC00970	1	168973635
1:168975869:C:T	ENSG00000203601	ncRNA_intronic	0	NA	NA	LINC00970	1	168975869
1:168976816:A:G	ENSG00000203601	ncRNA_intronic	0	NA	NA	LINC00970	1	168976816
1:168979764:C:G	ENSG00000203601	ncRNA_intronic	0	NA	NA	LINC00970	1	168979764
1:235389777:A:G	ENSG00000054267	intronic	0	NA	NA	ARID4B	1	235389777
1:235409403:C:G	ENSG00000054267	intronic	0	NA	NA	ARID4B	1	235409403
1:235433577:A:G	ENSG00000054267	intronic	0	NA	NA	ARID4B	1	235433577
1:235439317:C:T	ENSG00000054267	intronic	0	NA	NA	ARID4B	1	235439317
1:235460820:C:T	ENSG00000054267	intronic	0	NA	NA	ARID4B	1	235460820
1:235461945:C:T	ENSG00000054267	intronic	0	NA	NA	ARID4B	1	235461945
1:235466742:C:T	ENSG00000054267	intronic	0	NA	NA	ARID4B	1	235466742
3:3678700:C:T	ENSG00000223727	intergenic	9720	NA	NA	AC026188.1	3	3678700
3:3678700:C:T	ENSG00000223036	intergenic	9440	NA	NA	AC024158.1	3	3678700
3:3682388:A:G	ENSG00000223727	intergenic	13408	NA	NA	AC026188.1	3	3682388
3:3682388:A:G	ENSG00000223036	intergenic	5752	NA	NA	AC024158.1	3	3682388
3:3687572:C:G	ENSG00000223036	upstream	0	NA	NA	AC024158.1	3	3687572
3:3690193:A:G	ENSG00000223036	intergenic	1931	NA	NA	AC024158.1	3	3690193
3:3690193:A:G	NA	intergenic	NA	NA	NA	NA	3	3690193
3:3690554:C:G	ENSG00000223036	intergenic	2292	NA	NA	AC024158.1	3	3690554
3:3690554:C:G	NA	intergenic	NA	NA	NA	NA	3	3690554
3:3690695:C:G	ENSG00000223036	intergenic	2433	NA	NA	AC024158.1	3	3690695
3:3690695:C:G	NA	intergenic	NA	NA	NA	NA	3	3690695
3:16537969:C:T	ENSG00000131378	intronic	0	NA	NA	RFTN1	3	16537969
3:16609690:C:T	ENSG00000233570	intergenic	26810	NA	NA	LINC00690	3	16609690
3:16609690:C:T	ENSG00000092345	intergenic	18609	NA	NA	DAZL	3	16609690
3:16645881:A:G	ENSG00000092345	intronic	0	NA	NA	DAZL	3	16645881
3:73169286:A:G	ENSG00000223247	intergenic	8953	NA	NA	RNU2-64P	3	73169286
3:73169286:A:G	ENSG00000182921	intergenic	62366	NA	NA	CCDC75P1	3	73169286
3:73169969:A:G	ENSG00000223247	intergenic	9636	NA	NA	RNU2-64P	3	73169969
3:73169969:A:G	ENSG00000182921	intergenic	61683	NA	NA	CCDC75P1	3	73169969
3:73170358:A:G	ENSG00000223247	intergenic	10025	NA	NA	RNU2-64P	3	73170358
3:73170358:A:G	ENSG00000182921	intergenic	61294	NA	NA	CCDC75P1	3	73170358
3:73170472:C:T	ENSG00000223247	intergenic	10139	NA	NA	RNU2-64P	3	73170472
3:73170472:C:T	ENSG00000182921	intergenic	61180	NA	NA	CCDC75P1	3	73170472
3:73172100:C:T	ENSG00000223247	intergenic	11767	NA	NA	RNU2-64P	3	73172100
3:73172100:C:T	ENSG00000182921	intergenic	59552	NA	NA	CCDC75P1	3	73172100
3:73172835:C:T	ENSG00000223247	intergenic	12502	NA	NA	RNU2-64P	3	73172835
3:73172835:C:T	ENSG00000182921	intergenic	58817	NA	NA	CCDC75P1	3	73172835
3:73172836:G:T	ENSG00000223247	intergenic	12503	NA	NA	RNU2-64P	3	73172836
3:73172836:G:T	ENSG00000182921	intergenic	58816	NA	NA	CCDC75P1	3	73172836
3:73173272:A:G	ENSG00000223247	intergenic	12939	NA	NA	RNU2-64P	3	73173272
3:73173272:A:G	ENSG00000182921	intergenic	58380	NA	NA	CCDC75P1	3	73173272
3:73173307:A:C	ENSG00000223247	intergenic	12974	NA	NA	RNU2-64P	3	73173307
3:73173307:A:C	ENSG00000182921	intergenic	58345	NA	NA	CCDC75P1	3	73173307
3:73175304:C:CT	ENSG00000223247	intergenic	14971	NA	NA	RNU2-64P	3	73175304
3:73175304:C:CT	ENSG00000182921	intergenic	56347	NA	NA	CCDC75P1	3	73175304
3:73175528:A:G	ENSG00000223247	intergenic	15195	NA	NA	RNU2-64P	3	73175528
3:73175528:A:G	ENSG00000182921	intergenic	56124	NA	NA	CCDC75P1	3	73175528
3:73176949:C:T	ENSG00000223247	intergenic	16616	NA	NA	RNU2-64P	3	73176949
3:73176949:C:T	ENSG00000182921	intergenic	54703	NA	NA	CCDC75P1	3	73176949
3:73177228:C:T	ENSG00000223247	intergenic	16895	NA	NA	RNU2-64P	3	73177228
3:73177228:C:T	ENSG00000182921	intergenic	54424	NA	NA	CCDC75P1	3	73177228
3:73178951:C:CT	ENSG00000223247	intergenic	18618	NA	NA	RNU2-64P	3	73178951
3:73178951:C:CT	ENSG00000182921	intergenic	52700	NA	NA	CCDC75P1	3	73178951
3:73180313:C:T	ENSG00000223247	intergenic	19980	NA	NA	RNU2-64P	3	73180313
3:73180313:C:T	ENSG00000182921	intergenic	51339	NA	NA	CCDC75P1	3	73180313
3:73180500:A:G	ENSG00000223247	intergenic	20167	NA	NA	RNU2-64P	3	73180500
3:73180500:A:G	ENSG00000182921	intergenic	51152	NA	NA	CCDC75P1	3	73180500
3:73180639:C:T	ENSG00000223247	intergenic	20306	NA	NA	RNU2-64P	3	73180639
3:73180639:C:T	ENSG00000182921	intergenic	51013	NA	NA	CCDC75P1	3	73180639
3:73181539:A:G	ENSG00000223247	intergenic	21206	NA	NA	RNU2-64P	3	73181539
3:73181539:A:G	ENSG00000182921	intergenic	50113	NA	NA	CCDC75P1	3	73181539
3:73181813:C:T	ENSG00000223247	intergenic	21480	NA	NA	RNU2-64P	3	73181813
3:73181813:C:T	ENSG00000182921	intergenic	49839	NA	NA	CCDC75P1	3	73181813
3:73182547:A:G	ENSG00000223247	intergenic	22214	NA	NA	RNU2-64P	3	73182547
3:73182547:A:G	ENSG00000182921	intergenic	49105	NA	NA	CCDC75P1	3	73182547
3:73183673:C:T	ENSG00000223247	intergenic	23340	NA	NA	RNU2-64P	3	73183673
3:73183673:C:T	ENSG00000182921	intergenic	47979	NA	NA	CCDC75P1	3	73183673
3:73183751:A:C	ENSG00000223247	intergenic	23418	NA	NA	RNU2-64P	3	73183751
3:73183751:A:C	ENSG00000182921	intergenic	47901	NA	NA	CCDC75P1	3	73183751
3:73184281:C:T	ENSG00000223247	intergenic	23948	NA	NA	RNU2-64P	3	73184281
3:73184281:C:T	ENSG00000182921	intergenic	47371	NA	NA	CCDC75P1	3	73184281
3:73188810:G:GT	ENSG00000223247	intergenic	28477	NA	NA	RNU2-64P	3	73188810
3:73188810:G:GT	ENSG00000182921	intergenic	42841	NA	NA	CCDC75P1	3	73188810
3:73188980:A:T	ENSG00000223247	intergenic	28647	NA	NA	RNU2-64P	3	73188980
3:73188980:A:T	ENSG00000182921	intergenic	42672	NA	NA	CCDC75P1	3	73188980
3:73196648:C:CT	ENSG00000223247	intergenic	36315	NA	NA	RNU2-64P	3	73196648
3:73196648:C:CT	ENSG00000182921	intergenic	35004	NA	NA	CCDC75P1	3	73196648
3:73204957:C:T	ENSG00000223247	intergenic	44624	NA	NA	RNU2-64P	3	73204957
3:73204957:C:T	ENSG00000182921	intergenic	26695	NA	NA	CCDC75P1	3	73204957
3:73205112:G:T	ENSG00000223247	intergenic	44779	NA	NA	RNU2-64P	3	73205112
3:73205112:G:T	ENSG00000182921	intergenic	26540	NA	NA	CCDC75P1	3	73205112
3:73208295:G:T	ENSG00000223247	intergenic	47962	NA	NA	RNU2-64P	3	73208295
3:73208295:G:T	ENSG00000182921	intergenic	23357	NA	NA	CCDC75P1	3	73208295
3:73213062:A:C	ENSG00000223247	intergenic	52729	NA	NA	RNU2-64P	3	73213062
3:73213062:A:C	ENSG00000182921	intergenic	18590	NA	NA	CCDC75P1	3	73213062
5:55765634:C:T	ENSG00000248727	intronic	0	NA	NA	CTC-236F12.4	5	55765634
5:55766621:C:G	ENSG00000248727	intronic	0	NA	NA	CTC-236F12.4	5	55766621
5:103363305:C:T	ENSG00000112874	intergenic	464811	NA	NA	NUDT12	5	103363305
5:103363305:C:T	ENSG00000251026	intergenic	52307	NA	NA	RP11-138J23.1	5	103363305
5:103363386:C:T	ENSG00000112874	intergenic	464892	NA	NA	NUDT12	5	103363386
5:103363386:C:T	ENSG00000251026	intergenic	52226	NA	NA	RP11-138J23.1	5	103363386
5:103368161:C:T	ENSG00000112874	intergenic	469667	NA	NA	NUDT12	5	103368161
5:103368161:C:T	ENSG00000251026	intergenic	47451	NA	NA	RP11-138J23.1	5	103368161
5:103387872:A:G	ENSG00000112874	intergenic	489378	NA	NA	NUDT12	5	103387872
5:103387872:A:G	ENSG00000251026	intergenic	27740	NA	NA	RP11-138J23.1	5	103387872
5:103397948:C:CT	ENSG00000112874	intergenic	499454	NA	NA	NUDT12	5	103397948
5:103397948:C:CT	ENSG00000251026	intergenic	17664	NA	NA	RP11-138J23.1	5	103397948
5:103401291:C:T	ENSG00000112874	intergenic	502797	NA	NA	NUDT12	5	103401291
5:103401291:C:T	ENSG00000251026	intergenic	14321	NA	NA	RP11-138J23.1	5	103401291
5:103465289:G:GT	ENSG00000251026	intergenic	24185	NA	NA	RP11-138J23.1	5	103465289
5:103465289:G:GT	ENSG00000239808	intergenic	130945	NA	NA	RN7SL255P	5	103465289
5:103511086:G:T	ENSG00000251026	intergenic	69982	NA	NA	RP11-138J23.1	5	103511086
5:103511086:G:T	ENSG00000239808	intergenic	85148	NA	NA	RN7SL255P	5	103511086
5:103538940:C:T	ENSG00000251026	intergenic	97836	NA	NA	RP11-138J23.1	5	103538940
5:103538940:C:T	ENSG00000239808	intergenic	57294	NA	NA	RN7SL255P	5	103538940
5:103539962:C:T	ENSG00000251026	intergenic	98858	NA	NA	RP11-138J23.1	5	103539962
5:103539962:C:T	ENSG00000239808	intergenic	56272	NA	NA	RN7SL255P	5	103539962
5:103547410:A:G	ENSG00000251026	intergenic	106306	NA	NA	RP11-138J23.1	5	103547410
5:103547410:A:G	ENSG00000239808	intergenic	48824	NA	NA	RN7SL255P	5	103547410
5:103550442:A:T	ENSG00000251026	intergenic	109338	NA	NA	RP11-138J23.1	5	103550442
5:103550442:A:T	ENSG00000239808	intergenic	45792	NA	NA	RN7SL255P	5	103550442
5:103551497:C:T	ENSG00000251026	intergenic	110393	NA	NA	RP11-138J23.1	5	103551497
5:103551497:C:T	ENSG00000239808	intergenic	44737	NA	NA	RN7SL255P	5	103551497
5:103557776:C:T	ENSG00000251026	intergenic	116672	NA	NA	RP11-138J23.1	5	103557776
5:103557776:C:T	ENSG00000239808	intergenic	38458	NA	NA	RN7SL255P	5	103557776
5:103558018:A:T	ENSG00000251026	intergenic	116914	NA	NA	RP11-138J23.1	5	103558018
5:103558018:A:T	ENSG00000239808	intergenic	38216	NA	NA	RN7SL255P	5	103558018
5:103558918:A:G	ENSG00000251026	intergenic	117814	NA	NA	RP11-138J23.1	5	103558918
5:103558918:A:G	ENSG00000239808	intergenic	37316	NA	NA	RN7SL255P	5	103558918
5:103559104:A:G	ENSG00000251026	intergenic	118000	NA	NA	RP11-138J23.1	5	103559104
5:103559104:A:G	ENSG00000239808	intergenic	37130	NA	NA	RN7SL255P	5	103559104
5:103568248:A:G	ENSG00000251026	intergenic	127144	NA	NA	RP11-138J23.1	5	103568248
5:103568248:A:G	ENSG00000239808	intergenic	27986	NA	NA	RN7SL255P	5	103568248
5:103569315:A:T	ENSG00000251026	intergenic	128211	NA	NA	RP11-138J23.1	5	103569315
5:103569315:A:T	ENSG00000239808	intergenic	26919	NA	NA	RN7SL255P	5	103569315
5:103571069:C:T	ENSG00000251026	intergenic	129965	NA	NA	RP11-138J23.1	5	103571069
5:103571069:C:T	ENSG00000239808	intergenic	25165	NA	NA	RN7SL255P	5	103571069
5:103571168:A:G	ENSG00000251026	intergenic	130064	NA	NA	RP11-138J23.1	5	103571168
5:103571168:A:G	ENSG00000239808	intergenic	25066	NA	NA	RN7SL255P	5	103571168
5:103577276:C:T	ENSG00000251026	intergenic	136172	NA	NA	RP11-138J23.1	5	103577276
5:103577276:C:T	ENSG00000239808	intergenic	18958	NA	NA	RN7SL255P	5	103577276
5:103629690:C:CT	ENSG00000239808	intergenic	33163	NA	NA	RN7SL255P	5	103629690
5:103629690:C:CT	ENSG00000251574	intergenic	89308	NA	NA	RP11-6N13.1	5	103629690
5:103639407:A:G	ENSG00000239808	intergenic	42880	NA	NA	RN7SL255P	5	103639407
5:103639407:A:G	ENSG00000251574	intergenic	79592	NA	NA	RP11-6N13.1	5	103639407
5:103642435:A:G	ENSG00000239808	intergenic	45908	NA	NA	RN7SL255P	5	103642435
5:103642435:A:G	ENSG00000251574	intergenic	76564	NA	NA	RP11-6N13.1	5	103642435
5:103643248:A:G	ENSG00000239808	intergenic	46721	NA	NA	RN7SL255P	5	103643248
5:103643248:A:G	ENSG00000251574	intergenic	75751	NA	NA	RP11-6N13.1	5	103643248
5:103648378:C:T	ENSG00000239808	intergenic	51851	NA	NA	RN7SL255P	5	103648378
5:103648378:C:T	ENSG00000251574	intergenic	70621	NA	NA	RP11-6N13.1	5	103648378
5:103652241:C:G	ENSG00000239808	intergenic	55714	NA	NA	RN7SL255P	5	103652241
5:103652241:C:G	ENSG00000251574	intergenic	66758	NA	NA	RP11-6N13.1	5	103652241
5:103653979:C:T	ENSG00000239808	intergenic	57452	NA	NA	RN7SL255P	5	103653979
5:103653979:C:T	ENSG00000251574	intergenic	65020	NA	NA	RP11-6N13.1	5	103653979
5:103659732:A:ACTCT	ENSG00000239808	intergenic	63205	NA	NA	RN7SL255P	5	103659732
5:103659732:A:ACTCT	ENSG00000251574	intergenic	59267	NA	NA	RP11-6N13.1	5	103659732
5:103667017:C:T	ENSG00000239808	intergenic	70490	NA	NA	RN7SL255P	5	103667017
5:103667017:C:T	ENSG00000251574	intergenic	51982	NA	NA	RP11-6N13.1	5	103667017
5:103669240:A:C	ENSG00000239808	intergenic	72713	NA	NA	RN7SL255P	5	103669240
5:103669240:A:C	ENSG00000251574	intergenic	49759	NA	NA	RP11-6N13.1	5	103669240
5:103669565:A:G	ENSG00000239808	intergenic	73038	NA	NA	RN7SL255P	5	103669565
5:103669565:A:G	ENSG00000251574	intergenic	49434	NA	NA	RP11-6N13.1	5	103669565
5:172195092:A:G	ENSG00000253736	ncRNA_intronic	0	NA	NA	RP11-779O18.3	5	172195092
5:172196997:C:T	ENSG00000253736	ncRNA_intronic	0	NA	NA	RP11-779O18.3	5	172196997
5:172199366:A:G	ENSG00000253736	ncRNA_intronic	0	NA	NA	RP11-779O18.3	5	172199366
5:172199623:A:G	ENSG00000253736	ncRNA_intronic	0	NA	NA	RP11-779O18.3	5	172199623
5:172199716:C:CT	ENSG00000253736	ncRNA_intronic	0	NA	NA	RP11-779O18.3	5	172199716
5:172199964:T:TTA	ENSG00000253736	ncRNA_intronic	0	NA	NA	RP11-779O18.3	5	172199964
5:172200059:T:TG	ENSG00000253736	ncRNA_intronic	0	NA	NA	RP11-779O18.3	5	172200059
5:172201901:C:T	ENSG00000253736	ncRNA_intronic	0	NA	NA	RP11-779O18.3	5	172201901
5:172203148:C:G	ENSG00000253736	ncRNA_intronic	0	NA	NA	RP11-779O18.3	5	172203148
5:172203886:C:G	ENSG00000253736	ncRNA_intronic	0	NA	NA	RP11-779O18.3	5	172203886
5:172203892:C:G	ENSG00000253736	ncRNA_intronic	0	NA	NA	RP11-779O18.3	5	172203892
5:172204629:C:T	ENSG00000253736	ncRNA_exonic	0	NA	NA	RP11-779O18.3	5	172204629
5:172206412:A:G	ENSG00000206741	downstream	0	NA	NA	Y_RNA	5	172206412
5:172209023:A:G	ENSG00000206741	intergenic	1926	NA	NA	Y_RNA	5	172209023
5:172209023:A:G	ENSG00000270243	intergenic	3242	NA	NA	RP11-779O18.4	5	172209023
5:172213709:A:G	ENSG00000270243	intergenic	1282	NA	NA	RP11-779O18.4	5	172213709
5:172213709:A:G	ENSG00000253628	intergenic	29915	NA	NA	RP11-536N17.1	5	172213709
5:172213922:A:G	ENSG00000270243	intergenic	1495	NA	NA	RP11-779O18.4	5	172213922
5:172213922:A:G	ENSG00000253628	intergenic	29702	NA	NA	RP11-536N17.1	5	172213922
5:172215412:C:T	ENSG00000270243	intergenic	2985	NA	NA	RP11-779O18.4	5	172215412
5:172215412:C:T	ENSG00000253628	intergenic	28212	NA	NA	RP11-536N17.1	5	172215412
5:172217882:A:G	ENSG00000270243	intergenic	5455	NA	NA	RP11-779O18.4	5	172217882
5:172217882:A:G	ENSG00000253628	intergenic	25742	NA	NA	RP11-536N17.1	5	172217882
5:172218380:A:G	ENSG00000270243	intergenic	5953	NA	NA	RP11-779O18.4	5	172218380
5:172218380:A:G	ENSG00000253628	intergenic	25244	NA	NA	RP11-536N17.1	5	172218380
6:528736:G:T	ENSG00000112685	intronic	0	NA	NA	EXOC2	6	528736
6:541668:C:T	ENSG00000112685	intronic	0	NA	NA	EXOC2	6	541668
6:542868:C:G	ENSG00000112685	intronic	0	NA	NA	EXOC2	6	542868
6:544239:C:G	ENSG00000112685	intronic	0	NA	NA	EXOC2	6	544239
6:67192661:G:T	ENSG00000221281	intergenic	123269	NA	NA	AC002485.1	6	67192661
6:67192661:G:T	ENSG00000270521	intergenic	227474	NA	NA	RP11-24C14.1	6	67192661
6:67192850:A:G	ENSG00000221281	intergenic	123458	NA	NA	AC002485.1	6	67192850
6:67192850:A:G	ENSG00000270521	intergenic	227285	NA	NA	RP11-24C14.1	6	67192850
6:67192861:C:T	ENSG00000221281	intergenic	123469	NA	NA	AC002485.1	6	67192861
6:67192861:C:T	ENSG00000270521	intergenic	227274	NA	NA	RP11-24C14.1	6	67192861
6:67192921:A:T	ENSG00000221281	intergenic	123529	NA	NA	AC002485.1	6	67192921
6:67192921:A:T	ENSG00000270521	intergenic	227214	NA	NA	RP11-24C14.1	6	67192921
6:67193008:G:T	ENSG00000221281	intergenic	123616	NA	NA	AC002485.1	6	67193008
6:67193008:G:T	ENSG00000270521	intergenic	227127	NA	NA	RP11-24C14.1	6	67193008
6:67193053:G:T	ENSG00000221281	intergenic	123661	NA	NA	AC002485.1	6	67193053
6:67193053:G:T	ENSG00000270521	intergenic	227082	NA	NA	RP11-24C14.1	6	67193053
6:67193119:C:T	ENSG00000221281	intergenic	123727	NA	NA	AC002485.1	6	67193119
6:67193119:C:T	ENSG00000270521	intergenic	227016	NA	NA	RP11-24C14.1	6	67193119
6:67193288:G:T	ENSG00000221281	intergenic	123896	NA	NA	AC002485.1	6	67193288
6:67193288:G:T	ENSG00000270521	intergenic	226847	NA	NA	RP11-24C14.1	6	67193288
6:67193738:C:T	ENSG00000221281	intergenic	124346	NA	NA	AC002485.1	6	67193738
6:67193738:C:T	ENSG00000270521	intergenic	226397	NA	NA	RP11-24C14.1	6	67193738
6:67194074:A:G	ENSG00000221281	intergenic	124682	NA	NA	AC002485.1	6	67194074
6:67194074:A:G	ENSG00000270521	intergenic	226061	NA	NA	RP11-24C14.1	6	67194074
6:67194275:A:C	ENSG00000221281	intergenic	124883	NA	NA	AC002485.1	6	67194275
6:67194275:A:C	ENSG00000270521	intergenic	225860	NA	NA	RP11-24C14.1	6	67194275
6:67194450:A:G	ENSG00000221281	intergenic	125058	NA	NA	AC002485.1	6	67194450
6:67194450:A:G	ENSG00000270521	intergenic	225685	NA	NA	RP11-24C14.1	6	67194450
6:67194717:C:T	ENSG00000221281	intergenic	125325	NA	NA	AC002485.1	6	67194717
6:67194717:C:T	ENSG00000270521	intergenic	225418	NA	NA	RP11-24C14.1	6	67194717
6:67194835:A:G	ENSG00000221281	intergenic	125443	NA	NA	AC002485.1	6	67194835
6:67194835:A:G	ENSG00000270521	intergenic	225300	NA	NA	RP11-24C14.1	6	67194835
6:67195171:C:G	ENSG00000221281	intergenic	125779	NA	NA	AC002485.1	6	67195171
6:67195171:C:G	ENSG00000270521	intergenic	224964	NA	NA	RP11-24C14.1	6	67195171
6:67195177:A:T	ENSG00000221281	intergenic	125785	NA	NA	AC002485.1	6	67195177
6:67195177:A:T	ENSG00000270521	intergenic	224958	NA	NA	RP11-24C14.1	6	67195177
6:67195445:C:T	ENSG00000221281	intergenic	126053	NA	NA	AC002485.1	6	67195445
6:67195445:C:T	ENSG00000270521	intergenic	224690	NA	NA	RP11-24C14.1	6	67195445
6:67195743:C:G	ENSG00000221281	intergenic	126351	NA	NA	AC002485.1	6	67195743
6:67195743:C:G	ENSG00000270521	intergenic	224392	NA	NA	RP11-24C14.1	6	67195743
6:67196086:C:T	ENSG00000221281	intergenic	126694	NA	NA	AC002485.1	6	67196086
6:67196086:C:T	ENSG00000270521	intergenic	224049	NA	NA	RP11-24C14.1	6	67196086
6:67196427:C:T	ENSG00000221281	intergenic	127035	NA	NA	AC002485.1	6	67196427
6:67196427:C:T	ENSG00000270521	intergenic	223708	NA	NA	RP11-24C14.1	6	67196427
6:67196606:A:C	ENSG00000221281	intergenic	127214	NA	NA	AC002485.1	6	67196606
6:67196606:A:C	ENSG00000270521	intergenic	223529	NA	NA	RP11-24C14.1	6	67196606
6:67196647:G:GA	ENSG00000221281	intergenic	127255	NA	NA	AC002485.1	6	67196647
6:67196647:G:GA	ENSG00000270521	intergenic	223487	NA	NA	RP11-24C14.1	6	67196647
6:67196655:C:G	ENSG00000221281	intergenic	127263	NA	NA	AC002485.1	6	67196655
6:67196655:C:G	ENSG00000270521	intergenic	223480	NA	NA	RP11-24C14.1	6	67196655
6:67196765:A:T	ENSG00000221281	intergenic	127373	NA	NA	AC002485.1	6	67196765
6:67196765:A:T	ENSG00000270521	intergenic	223370	NA	NA	RP11-24C14.1	6	67196765
6:67196809:A:G	ENSG00000221281	intergenic	127417	NA	NA	AC002485.1	6	67196809
6:67196809:A:G	ENSG00000270521	intergenic	223326	NA	NA	RP11-24C14.1	6	67196809
6:67197132:C:T	ENSG00000221281	intergenic	127740	NA	NA	AC002485.1	6	67197132
6:67197132:C:T	ENSG00000270521	intergenic	223003	NA	NA	RP11-24C14.1	6	67197132
6:67197208:C:T	ENSG00000221281	intergenic	127816	NA	NA	AC002485.1	6	67197208
6:67197208:C:T	ENSG00000270521	intergenic	222927	NA	NA	RP11-24C14.1	6	67197208
6:67197596:C:T	ENSG00000221281	intergenic	128204	NA	NA	AC002485.1	6	67197596
6:67197596:C:T	ENSG00000270521	intergenic	222539	NA	NA	RP11-24C14.1	6	67197596
6:67197606:A:C	ENSG00000221281	intergenic	128214	NA	NA	AC002485.1	6	67197606
6:67197606:A:C	ENSG00000270521	intergenic	222529	NA	NA	RP11-24C14.1	6	67197606
6:67197675:G:T	ENSG00000221281	intergenic	128283	NA	NA	AC002485.1	6	67197675
6:67197675:G:T	ENSG00000270521	intergenic	222460	NA	NA	RP11-24C14.1	6	67197675
6:67197921:C:T	ENSG00000221281	intergenic	128529	NA	NA	AC002485.1	6	67197921
6:67197921:C:T	ENSG00000270521	intergenic	222214	NA	NA	RP11-24C14.1	6	67197921
6:67198084:G:T	ENSG00000221281	intergenic	128692	NA	NA	AC002485.1	6	67198084
6:67198084:G:T	ENSG00000270521	intergenic	222051	NA	NA	RP11-24C14.1	6	67198084
6:67198097:C:T	ENSG00000221281	intergenic	128705	NA	NA	AC002485.1	6	67198097
6:67198097:C:T	ENSG00000270521	intergenic	222038	NA	NA	RP11-24C14.1	6	67198097
6:67198231:C:T	ENSG00000221281	intergenic	128839	NA	NA	AC002485.1	6	67198231
6:67198231:C:T	ENSG00000270521	intergenic	221904	NA	NA	RP11-24C14.1	6	67198231
6:67198253:C:T	ENSG00000221281	intergenic	128861	NA	NA	AC002485.1	6	67198253
6:67198253:C:T	ENSG00000270521	intergenic	221882	NA	NA	RP11-24C14.1	6	67198253
6:67198281:C:T	ENSG00000221281	intergenic	128889	NA	NA	AC002485.1	6	67198281
6:67198281:C:T	ENSG00000270521	intergenic	221854	NA	NA	RP11-24C14.1	6	67198281
6:67198404:A:G	ENSG00000221281	intergenic	129012	NA	NA	AC002485.1	6	67198404
6:67198404:A:G	ENSG00000270521	intergenic	221731	NA	NA	RP11-24C14.1	6	67198404
6:67198408:C:T	ENSG00000221281	intergenic	129016	NA	NA	AC002485.1	6	67198408
6:67198408:C:T	ENSG00000270521	intergenic	221727	NA	NA	RP11-24C14.1	6	67198408
6:67198479:A:T	ENSG00000221281	intergenic	129087	NA	NA	AC002485.1	6	67198479
6:67198479:A:T	ENSG00000270521	intergenic	221656	NA	NA	RP11-24C14.1	6	67198479
6:67198983:A:G	ENSG00000221281	intergenic	129591	NA	NA	AC002485.1	6	67198983
6:67198983:A:G	ENSG00000270521	intergenic	221152	NA	NA	RP11-24C14.1	6	67198983
6:67199084:A:G	ENSG00000221281	intergenic	129692	NA	NA	AC002485.1	6	67199084
6:67199084:A:G	ENSG00000270521	intergenic	221051	NA	NA	RP11-24C14.1	6	67199084
6:67199091:G:T	ENSG00000221281	intergenic	129699	NA	NA	AC002485.1	6	67199091
6:67199091:G:T	ENSG00000270521	intergenic	221044	NA	NA	RP11-24C14.1	6	67199091
6:67199181:C:G	ENSG00000221281	intergenic	129789	NA	NA	AC002485.1	6	67199181
6:67199181:C:G	ENSG00000270521	intergenic	220954	NA	NA	RP11-24C14.1	6	67199181
6:67199342:C:T	ENSG00000221281	intergenic	129950	NA	NA	AC002485.1	6	67199342
6:67199342:C:T	ENSG00000270521	intergenic	220793	NA	NA	RP11-24C14.1	6	67199342
6:67199359:C:T	ENSG00000221281	intergenic	129967	NA	NA	AC002485.1	6	67199359
6:67199359:C:T	ENSG00000270521	intergenic	220776	NA	NA	RP11-24C14.1	6	67199359
6:67199978:A:G	ENSG00000221281	intergenic	130586	NA	NA	AC002485.1	6	67199978
6:67199978:A:G	ENSG00000270521	intergenic	220157	NA	NA	RP11-24C14.1	6	67199978
6:67200276:A:C	ENSG00000221281	intergenic	130884	NA	NA	AC002485.1	6	67200276
6:67200276:A:C	ENSG00000270521	intergenic	219859	NA	NA	RP11-24C14.1	6	67200276
6:67200436:A:T	ENSG00000221281	intergenic	131044	NA	NA	AC002485.1	6	67200436
6:67200436:A:T	ENSG00000270521	intergenic	219699	NA	NA	RP11-24C14.1	6	67200436
6:67200766:G:T	ENSG00000221281	intergenic	131374	NA	NA	AC002485.1	6	67200766
6:67200766:G:T	ENSG00000270521	intergenic	219369	NA	NA	RP11-24C14.1	6	67200766
6:67200802:C:T	ENSG00000221281	intergenic	131410	NA	NA	AC002485.1	6	67200802
6:67200802:C:T	ENSG00000270521	intergenic	219333	NA	NA	RP11-24C14.1	6	67200802
6:67201019:G:T	ENSG00000221281	intergenic	131627	NA	NA	AC002485.1	6	67201019
6:67201019:G:T	ENSG00000270521	intergenic	219116	NA	NA	RP11-24C14.1	6	67201019
6:67201441:C:T	ENSG00000221281	intergenic	132049	NA	NA	AC002485.1	6	67201441
6:67201441:C:T	ENSG00000270521	intergenic	218694	NA	NA	RP11-24C14.1	6	67201441
6:67201449:A:C	ENSG00000221281	intergenic	132057	NA	NA	AC002485.1	6	67201449
6:67201449:A:C	ENSG00000270521	intergenic	218686	NA	NA	RP11-24C14.1	6	67201449
6:67201586:A:G	ENSG00000221281	intergenic	132194	NA	NA	AC002485.1	6	67201586
6:67201586:A:G	ENSG00000270521	intergenic	218549	NA	NA	RP11-24C14.1	6	67201586
6:67201617:C:T	ENSG00000221281	intergenic	132225	NA	NA	AC002485.1	6	67201617
6:67201617:C:T	ENSG00000270521	intergenic	218518	NA	NA	RP11-24C14.1	6	67201617
6:67201922:C:G	ENSG00000221281	intergenic	132530	NA	NA	AC002485.1	6	67201922
6:67201922:C:G	ENSG00000270521	intergenic	218213	NA	NA	RP11-24C14.1	6	67201922
6:67201992:A:G	ENSG00000221281	intergenic	132600	NA	NA	AC002485.1	6	67201992
6:67201992:A:G	ENSG00000270521	intergenic	218143	NA	NA	RP11-24C14.1	6	67201992
6:67202110:C:CA	ENSG00000221281	intergenic	132718	NA	NA	AC002485.1	6	67202110
6:67202110:C:CA	ENSG00000270521	intergenic	218025	NA	NA	RP11-24C14.1	6	67202110
6:67202118:A:T	ENSG00000221281	intergenic	132726	NA	NA	AC002485.1	6	67202118
6:67202118:A:T	ENSG00000270521	intergenic	218017	NA	NA	RP11-24C14.1	6	67202118
6:67202467:A:C	ENSG00000221281	intergenic	133075	NA	NA	AC002485.1	6	67202467
6:67202467:A:C	ENSG00000270521	intergenic	217668	NA	NA	RP11-24C14.1	6	67202467
6:67202505:A:C	ENSG00000221281	intergenic	133113	NA	NA	AC002485.1	6	67202505
6:67202505:A:C	ENSG00000270521	intergenic	217630	NA	NA	RP11-24C14.1	6	67202505
6:67202618:A:T	ENSG00000221281	intergenic	133226	NA	NA	AC002485.1	6	67202618
6:67202618:A:T	ENSG00000270521	intergenic	217517	NA	NA	RP11-24C14.1	6	67202618
6:67202764:C:T	ENSG00000221281	intergenic	133372	NA	NA	AC002485.1	6	67202764
6:67202764:C:T	ENSG00000270521	intergenic	217371	NA	NA	RP11-24C14.1	6	67202764
6:67202810:A:G	ENSG00000221281	intergenic	133418	NA	NA	AC002485.1	6	67202810
6:67202810:A:G	ENSG00000270521	intergenic	217325	NA	NA	RP11-24C14.1	6	67202810
6:67202923:A:T	ENSG00000221281	intergenic	133531	NA	NA	AC002485.1	6	67202923
6:67202923:A:T	ENSG00000270521	intergenic	217212	NA	NA	RP11-24C14.1	6	67202923
6:67203267:A:C	ENSG00000221281	intergenic	133875	NA	NA	AC002485.1	6	67203267
6:67203267:A:C	ENSG00000270521	intergenic	216868	NA	NA	RP11-24C14.1	6	67203267
6:67203569:G:GA	ENSG00000221281	intergenic	134177	NA	NA	AC002485.1	6	67203569
6:67203569:G:GA	ENSG00000270521	intergenic	216566	NA	NA	RP11-24C14.1	6	67203569
6:67203655:G:T	ENSG00000221281	intergenic	134263	NA	NA	AC002485.1	6	67203655
6:67203655:G:T	ENSG00000270521	intergenic	216480	NA	NA	RP11-24C14.1	6	67203655
6:67203967:C:T	ENSG00000221281	intergenic	134575	NA	NA	AC002485.1	6	67203967
6:67203967:C:T	ENSG00000270521	intergenic	216168	NA	NA	RP11-24C14.1	6	67203967
6:67204137:A:G	ENSG00000221281	intergenic	134745	NA	NA	AC002485.1	6	67204137
6:67204137:A:G	ENSG00000270521	intergenic	215998	NA	NA	RP11-24C14.1	6	67204137
6:67204382:A:G	ENSG00000221281	intergenic	134990	NA	NA	AC002485.1	6	67204382
6:67204382:A:G	ENSG00000270521	intergenic	215753	NA	NA	RP11-24C14.1	6	67204382
6:67204394:A:C	ENSG00000221281	intergenic	135002	NA	NA	AC002485.1	6	67204394
6:67204394:A:C	ENSG00000270521	intergenic	215741	NA	NA	RP11-24C14.1	6	67204394
6:67205084:C:T	ENSG00000221281	intergenic	135692	NA	NA	AC002485.1	6	67205084
6:67205084:C:T	ENSG00000270521	intergenic	215051	NA	NA	RP11-24C14.1	6	67205084
6:67205504:A:G	ENSG00000221281	intergenic	136112	NA	NA	AC002485.1	6	67205504
6:67205504:A:G	ENSG00000270521	intergenic	214631	NA	NA	RP11-24C14.1	6	67205504
6:67205553:A:G	ENSG00000221281	intergenic	136161	NA	NA	AC002485.1	6	67205553
6:67205553:A:G	ENSG00000270521	intergenic	214582	NA	NA	RP11-24C14.1	6	67205553
6:67205557:C:G	ENSG00000221281	intergenic	136165	NA	NA	AC002485.1	6	67205557
6:67205557:C:G	ENSG00000270521	intergenic	214578	NA	NA	RP11-24C14.1	6	67205557
6:67205994:T:TA	ENSG00000221281	intergenic	136602	NA	NA	AC002485.1	6	67205994
6:67205994:T:TA	ENSG00000270521	intergenic	214141	NA	NA	RP11-24C14.1	6	67205994
6:67206165:G:T	ENSG00000221281	intergenic	136773	NA	NA	AC002485.1	6	67206165
6:67206165:G:T	ENSG00000270521	intergenic	213970	NA	NA	RP11-24C14.1	6	67206165
6:67206225:C:T	ENSG00000221281	intergenic	136833	NA	NA	AC002485.1	6	67206225
6:67206225:C:T	ENSG00000270521	intergenic	213910	NA	NA	RP11-24C14.1	6	67206225
6:67206262:C:G	ENSG00000221281	intergenic	136870	NA	NA	AC002485.1	6	67206262
6:67206262:C:G	ENSG00000270521	intergenic	213873	NA	NA	RP11-24C14.1	6	67206262
6:67206289:G:T	ENSG00000221281	intergenic	136897	NA	NA	AC002485.1	6	67206289
6:67206289:G:T	ENSG00000270521	intergenic	213846	NA	NA	RP11-24C14.1	6	67206289
6:67206308:A:G	ENSG00000221281	intergenic	136916	NA	NA	AC002485.1	6	67206308
6:67206308:A:G	ENSG00000270521	intergenic	213827	NA	NA	RP11-24C14.1	6	67206308
6:67206530:A:G	ENSG00000221281	intergenic	137138	NA	NA	AC002485.1	6	67206530
6:67206530:A:G	ENSG00000270521	intergenic	213605	NA	NA	RP11-24C14.1	6	67206530
6:67206911:A:G	ENSG00000221281	intergenic	137519	NA	NA	AC002485.1	6	67206911
6:67206911:A:G	ENSG00000270521	intergenic	213224	NA	NA	RP11-24C14.1	6	67206911
6:67207025:C:T	ENSG00000221281	intergenic	137633	NA	NA	AC002485.1	6	67207025
6:67207025:C:T	ENSG00000270521	intergenic	213110	NA	NA	RP11-24C14.1	6	67207025
6:67207111:A:T	ENSG00000221281	intergenic	137719	NA	NA	AC002485.1	6	67207111
6:67207111:A:T	ENSG00000270521	intergenic	213024	NA	NA	RP11-24C14.1	6	67207111
6:67207549:G:GC	ENSG00000221281	intergenic	138157	NA	NA	AC002485.1	6	67207549
6:67207549:G:GC	ENSG00000270521	intergenic	212586	NA	NA	RP11-24C14.1	6	67207549
6:67208117:A:G	ENSG00000221281	intergenic	138725	NA	NA	AC002485.1	6	67208117
6:67208117:A:G	ENSG00000270521	intergenic	212018	NA	NA	RP11-24C14.1	6	67208117
6:67208118:C:T	ENSG00000221281	intergenic	138726	NA	NA	AC002485.1	6	67208118
6:67208118:C:T	ENSG00000270521	intergenic	212017	NA	NA	RP11-24C14.1	6	67208118
6:67208626:A:G	ENSG00000221281	intergenic	139234	NA	NA	AC002485.1	6	67208626
6:67208626:A:G	ENSG00000270521	intergenic	211509	NA	NA	RP11-24C14.1	6	67208626
6:67208661:C:T	ENSG00000221281	intergenic	139269	NA	NA	AC002485.1	6	67208661
6:67208661:C:T	ENSG00000270521	intergenic	211474	NA	NA	RP11-24C14.1	6	67208661
6:67208679:A:G	ENSG00000221281	intergenic	139287	NA	NA	AC002485.1	6	67208679
6:67208679:A:G	ENSG00000270521	intergenic	211456	NA	NA	RP11-24C14.1	6	67208679
6:67208830:G:GAT	ENSG00000221281	intergenic	139438	NA	NA	AC002485.1	6	67208830
6:67208830:G:GAT	ENSG00000270521	intergenic	211303	NA	NA	RP11-24C14.1	6	67208830
6:67208865:T:TATATATATATATATG	ENSG00000221281	intergenic	139473	NA	NA	AC002485.1	6	67208865
6:67208865:T:TATATATATATATATG	ENSG00000270521	intergenic	211270	NA	NA	RP11-24C14.1	6	67208865
6:67208903:A:G	ENSG00000221281	intergenic	139511	NA	NA	AC002485.1	6	67208903
6:67208903:A:G	ENSG00000270521	intergenic	211232	NA	NA	RP11-24C14.1	6	67208903
6:67208946:G:T	ENSG00000221281	intergenic	139554	NA	NA	AC002485.1	6	67208946
6:67208946:G:T	ENSG00000270521	intergenic	211189	NA	NA	RP11-24C14.1	6	67208946
6:67209309:A:G	ENSG00000221281	intergenic	139917	NA	NA	AC002485.1	6	67209309
6:67209309:A:G	ENSG00000270521	intergenic	210826	NA	NA	RP11-24C14.1	6	67209309
6:67209441:A:C	ENSG00000221281	intergenic	140049	NA	NA	AC002485.1	6	67209441
6:67209441:A:C	ENSG00000270521	intergenic	210694	NA	NA	RP11-24C14.1	6	67209441
6:67210545:A:G	ENSG00000221281	intergenic	141153	NA	NA	AC002485.1	6	67210545
6:67210545:A:G	ENSG00000270521	intergenic	209590	NA	NA	RP11-24C14.1	6	67210545
6:67211566:G:T	ENSG00000221281	intergenic	142174	NA	NA	AC002485.1	6	67211566
6:67211566:G:T	ENSG00000270521	intergenic	208569	NA	NA	RP11-24C14.1	6	67211566
6:67212707:A:G	ENSG00000221281	intergenic	143315	NA	NA	AC002485.1	6	67212707
6:67212707:A:G	ENSG00000270521	intergenic	207428	NA	NA	RP11-24C14.1	6	67212707
6:67213836:A:G	ENSG00000221281	intergenic	144444	NA	NA	AC002485.1	6	67213836
6:67213836:A:G	ENSG00000270521	intergenic	206299	NA	NA	RP11-24C14.1	6	67213836
6:67214166:A:G	ENSG00000221281	intergenic	144774	NA	NA	AC002485.1	6	67214166
6:67214166:A:G	ENSG00000270521	intergenic	205969	NA	NA	RP11-24C14.1	6	67214166
6:67218854:A:C	ENSG00000221281	intergenic	149462	NA	NA	AC002485.1	6	67218854
6:67218854:A:C	ENSG00000270521	intergenic	201281	NA	NA	RP11-24C14.1	6	67218854
6:67219668:C:T	ENSG00000221281	intergenic	150276	NA	NA	AC002485.1	6	67219668
6:67219668:C:T	ENSG00000270521	intergenic	200467	NA	NA	RP11-24C14.1	6	67219668
6:67222344:A:G	ENSG00000221281	intergenic	152952	NA	NA	AC002485.1	6	67222344
6:67222344:A:G	ENSG00000270521	intergenic	197791	NA	NA	RP11-24C14.1	6	67222344
6:67222565:C:T	ENSG00000221281	intergenic	153173	NA	NA	AC002485.1	6	67222565
6:67222565:C:T	ENSG00000270521	intergenic	197570	NA	NA	RP11-24C14.1	6	67222565
6:67224061:C:T	ENSG00000221281	intergenic	154669	NA	NA	AC002485.1	6	67224061
6:67224061:C:T	ENSG00000270521	intergenic	196074	NA	NA	RP11-24C14.1	6	67224061
6:67227883:A:G	ENSG00000221281	intergenic	158491	NA	NA	AC002485.1	6	67227883
6:67227883:A:G	ENSG00000270521	intergenic	192252	NA	NA	RP11-24C14.1	6	67227883
6:67229748:C:T	ENSG00000221281	intergenic	160356	NA	NA	AC002485.1	6	67229748
6:67229748:C:T	ENSG00000270521	intergenic	190387	NA	NA	RP11-24C14.1	6	67229748
6:67230090:A:G	ENSG00000221281	intergenic	160698	NA	NA	AC002485.1	6	67230090
6:67230090:A:G	ENSG00000270521	intergenic	190045	NA	NA	RP11-24C14.1	6	67230090
6:67230499:C:T	ENSG00000221281	intergenic	161107	NA	NA	AC002485.1	6	67230499
6:67230499:C:T	ENSG00000270521	intergenic	189636	NA	NA	RP11-24C14.1	6	67230499
6:67230675:A:G	ENSG00000221281	intergenic	161283	NA	NA	AC002485.1	6	67230675
6:67230675:A:G	ENSG00000270521	intergenic	189460	NA	NA	RP11-24C14.1	6	67230675
6:67231094:A:G	ENSG00000221281	intergenic	161702	NA	NA	AC002485.1	6	67231094
6:67231094:A:G	ENSG00000270521	intergenic	189041	NA	NA	RP11-24C14.1	6	67231094
6:67231640:A:C	ENSG00000221281	intergenic	162248	NA	NA	AC002485.1	6	67231640
6:67231640:A:C	ENSG00000270521	intergenic	188495	NA	NA	RP11-24C14.1	6	67231640
6:67231744:T:TA	ENSG00000221281	intergenic	162352	NA	NA	AC002485.1	6	67231744
6:67231744:T:TA	ENSG00000270521	intergenic	188391	NA	NA	RP11-24C14.1	6	67231744
6:67231749:G:T	ENSG00000221281	intergenic	162357	NA	NA	AC002485.1	6	67231749
6:67231749:G:T	ENSG00000270521	intergenic	188386	NA	NA	RP11-24C14.1	6	67231749
6:67231752:GT:TT	ENSG00000221281	intergenic	162360	NA	NA	AC002485.1	6	67231752
6:67231752:GT:TT	ENSG00000270521	intergenic	188382	NA	NA	RP11-24C14.1	6	67231752
6:67232281:A:AGT	ENSG00000221281	intergenic	162889	NA	NA	AC002485.1	6	67232281
6:67232281:A:AGT	ENSG00000270521	intergenic	187852	NA	NA	RP11-24C14.1	6	67232281
6:67232860:A:C	ENSG00000221281	intergenic	163468	NA	NA	AC002485.1	6	67232860
6:67232860:A:C	ENSG00000270521	intergenic	187275	NA	NA	RP11-24C14.1	6	67232860
6:67234687:A:G	ENSG00000221281	intergenic	165295	NA	NA	AC002485.1	6	67234687
6:67234687:A:G	ENSG00000270521	intergenic	185448	NA	NA	RP11-24C14.1	6	67234687
6:67235081:T:TA	ENSG00000221281	intergenic	165689	NA	NA	AC002485.1	6	67235081
6:67235081:T:TA	ENSG00000270521	intergenic	185053	NA	NA	RP11-24C14.1	6	67235081
6:67235277:A:G	ENSG00000221281	intergenic	165885	NA	NA	AC002485.1	6	67235277
6:67235277:A:G	ENSG00000270521	intergenic	184858	NA	NA	RP11-24C14.1	6	67235277
6:67235278:C:T	ENSG00000221281	intergenic	165886	NA	NA	AC002485.1	6	67235278
6:67235278:C:T	ENSG00000270521	intergenic	184857	NA	NA	RP11-24C14.1	6	67235278
6:67237749:C:T	ENSG00000221281	intergenic	168357	NA	NA	AC002485.1	6	67237749
6:67237749:C:T	ENSG00000270521	intergenic	182386	NA	NA	RP11-24C14.1	6	67237749
6:67238099:A:G	ENSG00000221281	intergenic	168707	NA	NA	AC002485.1	6	67238099
6:67238099:A:G	ENSG00000270521	intergenic	182036	NA	NA	RP11-24C14.1	6	67238099
6:67242496:C:T	ENSG00000221281	intergenic	173104	NA	NA	AC002485.1	6	67242496
6:67242496:C:T	ENSG00000270521	intergenic	177639	NA	NA	RP11-24C14.1	6	67242496
6:67247455:G:T	ENSG00000221281	intergenic	178063	NA	NA	AC002485.1	6	67247455
6:67247455:G:T	ENSG00000270521	intergenic	172680	NA	NA	RP11-24C14.1	6	67247455
7:31685507:A:C	ENSG00000180347	intronic	0	NA	NA	CCDC129	7	31685507
9:114435160:G:T	ENSG00000242616	intergenic	2634	NA	NA	GNG10	9	114435160
9:114435160:G:T	ENSG00000165181	intergenic	13293	NA	NA	C9orf84	9	114435160
9:114479115:C:T	ENSG00000165181	intronic	0	NA	NA	C9orf84	9	114479115
9:114591558:A:G	ENSG00000224067	intergenic	25843	NA	NA	RP11-430K21.2	9	114591558
9:114591558:A:G	ENSG00000206907	intergenic	10550	NA	NA	RNU6-1013P	9	114591558
9:114662006:A:AT	ENSG00000148154	intronic	0	NA	NA	UGCG	9	114662006
13:66457996:A:T	ENSG00000234767	intergenic	5645	NA	NA	LINC01052	13	66457996
13:66457996:A:T	ENSG00000263581	intergenic	82466	NA	NA	MIR548X2	13	66457996
13:66534731:C:T	ENSG00000234767	intergenic	82380	NA	NA	LINC01052	13	66534731
13:66534731:C:T	ENSG00000263581	intergenic	5731	NA	NA	MIR548X2	13	66534731
13:66573653:A:AT	ENSG00000263581	intergenic	33092	NA	NA	MIR548X2	13	66573653
13:66573653:A:AT	ENSG00000263561	intergenic	218728	NA	NA	MIR4704	13	66573653
13:66604613:A:G	ENSG00000263581	intergenic	64052	NA	NA	MIR548X2	13	66604613
13:66604613:A:G	ENSG00000263561	intergenic	187769	NA	NA	MIR4704	13	66604613
13:66634391:A:G	ENSG00000263581	intergenic	93830	NA	NA	MIR548X2	13	66634391
13:66634391:A:G	ENSG00000263561	intergenic	157991	NA	NA	MIR4704	13	66634391
13:66642011:A:G	ENSG00000263581	intergenic	101450	NA	NA	MIR548X2	13	66642011
13:66642011:A:G	ENSG00000263561	intergenic	150371	NA	NA	MIR4704	13	66642011
13:66768308:A:G	ENSG00000263581	intergenic	227747	NA	NA	MIR548X2	13	66768308
13:66768308:A:G	ENSG00000263561	intergenic	24074	NA	NA	MIR4704	13	66768308
13:66787141:A:T	ENSG00000263581	intergenic	246580	NA	NA	MIR548X2	13	66787141
13:66787141:A:T	ENSG00000263561	intergenic	5241	NA	NA	MIR4704	13	66787141
13:66792439:C:T	ENSG00000263561	ncRNA_exonic	0	NA	NA	MIR4704	13	66792439
13:66813437:G:T	ENSG00000263561	intergenic	20981	NA	NA	MIR4704	13	66813437
13:66813437:G:T	ENSG00000235737	intergenic	29692	NA	NA	TRIM60P19	13	66813437
13:66824419:A:C	ENSG00000263561	intergenic	31963	NA	NA	MIR4704	13	66824419
13:66824419:A:C	ENSG00000235737	intergenic	18710	NA	NA	TRIM60P19	13	66824419
13:66833128:A:G	ENSG00000263561	intergenic	40672	NA	NA	MIR4704	13	66833128
13:66833128:A:G	ENSG00000235737	intergenic	10001	NA	NA	TRIM60P19	13	66833128
13:66996044:A:C	ENSG00000184226	intronic	0	NA	NA	PCDH9	13	66996044
13:67248036:A:C	ENSG00000184226	intronic	0	NA	NA	PCDH9	13	67248036
13:67312169:A:G	ENSG00000184226	intronic	0	NA	NA	PCDH9	13	67312169
13:67331214:C:T	ENSG00000184226	intronic	0	NA	NA	PCDH9	13	67331214
13:67412175:C:T	ENSG00000228842	ncRNA_intronic	0	NA	NA	PCDH9-AS2	13	67412175
14:26665745:A:T	ENSG00000212037	intergenic	24281	NA	NA	AL049831.1	14	26665745
14:26665745:A:T	ENSG00000257503	intergenic	11497	NA	NA	CYB5AP5	14	26665745
14:26668335:A:T	ENSG00000212037	intergenic	26871	NA	NA	AL049831.1	14	26668335
14:26668335:A:T	ENSG00000257503	intergenic	8907	NA	NA	CYB5AP5	14	26668335
14:26671022:C:T	ENSG00000212037	intergenic	29558	NA	NA	AL049831.1	14	26671022
14:26671022:C:T	ENSG00000257503	intergenic	6220	NA	NA	CYB5AP5	14	26671022
14:26673602:C:T	ENSG00000212037	intergenic	32138	NA	NA	AL049831.1	14	26673602
14:26673602:C:T	ENSG00000257503	intergenic	3640	NA	NA	CYB5AP5	14	26673602
14:26676874:C:T	ENSG00000257503	upstream	0	NA	NA	CYB5AP5	14	26676874
14:26680680:A:G	ENSG00000257503	intergenic	3050	NA	NA	CYB5AP5	14	26680680
14:26680680:A:G	ENSG00000139910	intergenic	231619	NA	NA	NOVA1	14	26680680
14:26681319:C:T	ENSG00000257503	intergenic	3689	NA	NA	CYB5AP5	14	26681319
14:26681319:C:T	ENSG00000139910	intergenic	230980	NA	NA	NOVA1	14	26681319
14:26681673:A:G	ENSG00000257503	intergenic	4043	NA	NA	CYB5AP5	14	26681673
14:26681673:A:G	ENSG00000139910	intergenic	230626	NA	NA	NOVA1	14	26681673
14:26682550:A:G	ENSG00000257503	intergenic	4920	NA	NA	CYB5AP5	14	26682550
14:26682550:A:G	ENSG00000139910	intergenic	229749	NA	NA	NOVA1	14	26682550
14:33367794:A:T	ENSG00000151320	intergenic	67227	NA	NA	AKAP6	14	33367794
14:33367794:A:T	ENSG00000151322	intergenic	36345	NA	NA	NPAS3	14	33367794
15:85996416:G:T	ENSG00000170776	intronic	0	NA	NA	AKAP13	15	85996416
15:86003010:A:G	ENSG00000170776	intronic	0	NA	NA	AKAP13	15	86003010
15:86004340:A:AATTTT	ENSG00000170776	intronic	0	NA	NA	AKAP13	15	86004340
15:86010345:A:C	ENSG00000170776	intronic	0	NA	NA	AKAP13	15	86010345
15:86012397:C:T	ENSG00000170776	intronic	0	NA	NA	AKAP13	15	86012397
15:86015439:A:AC	ENSG00000170776	intronic	0	NA	NA	AKAP13	15	86015439
18:64280117:A:G	ENSG00000071991	intergenic	8742	NA	NA	CDH19	18	64280117
18:64280117:A:G	ENSG00000221536	intergenic	40529	NA	NA	AC091643.1	18	64280117
18:64312452:C:T	ENSG00000071991	intergenic	41077	NA	NA	CDH19	18	64312452
18:64312452:C:T	ENSG00000221536	intergenic	8194	NA	NA	AC091643.1	18	64312452
18:64363576:G:T	ENSG00000221536	intergenic	42838	NA	NA	AC091643.1	18	64363576
18:64363576:G:T	ENSG00000238680	intergenic	249777	NA	NA	RNU6-1037P	18	64363576
18:64424848:A:G	ENSG00000221536	intergenic	104110	NA	NA	AC091643.1	18	64424848
18:64424848:A:G	ENSG00000238680	intergenic	188505	NA	NA	RNU6-1037P	18	64424848
18:64481666:C:T	ENSG00000221536	intergenic	160928	NA	NA	AC091643.1	18	64481666
18:64481666:C:T	ENSG00000238680	intergenic	131687	NA	NA	RNU6-1037P	18	64481666
18:64505076:C:G	ENSG00000221536	intergenic	184338	NA	NA	AC091643.1	18	64505076
18:64505076:C:G	ENSG00000238680	intergenic	108277	NA	NA	RNU6-1037P	18	64505076
18:64516145:A:T	ENSG00000221536	intergenic	195407	NA	NA	AC091643.1	18	64516145
18:64516145:A:T	ENSG00000238680	intergenic	97208	NA	NA	RNU6-1037P	18	64516145
18:64531955:A:T	ENSG00000221536	intergenic	211217	NA	NA	AC091643.1	18	64531955
18:64531955:A:T	ENSG00000238680	intergenic	81398	NA	NA	RNU6-1037P	18	64531955
18:64674501:A:G	ENSG00000238680	intergenic	61042	NA	NA	RNU6-1037P	18	64674501
18:64674501:A:G	ENSG00000264409	intergenic	36103	NA	NA	AC113195.1	18	64674501
20:45607859:A:C	ENSG00000064655	intronic	0	NA	NA	EYA2	20	45607859
23:25712567:G:T	ENSG00000228519	intergenic	48123	NA	NA	RP11-298C3.2	23	25712567
23:25712567:G:T	ENSG00000233403	intergenic	183889	NA	NA	RP11-86A5.1	23	25712567
23:25716955:A:G	ENSG00000228519	intergenic	52511	NA	NA	RP11-298C3.2	23	25716955
23:25716955:A:G	ENSG00000233403	intergenic	179501	NA	NA	RP11-86A5.1	23	25716955
23:86952348:A:G	ENSG00000102271	intergenic	27298	NA	NA	KLHL4	23	86952348
23:86952348:A:G	ENSG00000237506	intergenic	5929	NA	NA	RPSAP15	23	86952348
23:86993358:T:TATATATATATATATATAC	ENSG00000271205	intergenic	15120	NA	NA	RP1-138A5.2	23	86993358
23:86993358:T:TATATATATATATATATAC	ENSG00000270446	intergenic	68075	NA	NA	RP6-43L17.1	23	86993358
23:86993496:A:G	ENSG00000271205	intergenic	15258	NA	NA	RP1-138A5.2	23	86993496
23:86993496:A:G	ENSG00000270446	intergenic	67937	NA	NA	RP6-43L17.1	23	86993496
23:86994135:T:TA	ENSG00000271205	intergenic	15897	NA	NA	RP1-138A5.2	23	86994135
23:86994135:T:TA	ENSG00000270446	intergenic	67298	NA	NA	RP6-43L17.1	23	86994135
23:86995349:C:T	ENSG00000271205	intergenic	17111	NA	NA	RP1-138A5.2	23	86995349
23:86995349:C:T	ENSG00000270446	intergenic	66084	NA	NA	RP6-43L17.1	23	86995349
23:86995449:C:CT	ENSG00000271205	intergenic	17211	NA	NA	RP1-138A5.2	23	86995449
23:86995449:C:CT	ENSG00000270446	intergenic	65984	NA	NA	RP6-43L17.1	23	86995449
23:86998224:G:T	ENSG00000271205	intergenic	19986	NA	NA	RP1-138A5.2	23	86998224
23:86998224:G:T	ENSG00000270446	intergenic	63209	NA	NA	RP6-43L17.1	23	86998224
23:86998300:C:T	ENSG00000271205	intergenic	20062	NA	NA	RP1-138A5.2	23	86998300
23:86998300:C:T	ENSG00000270446	intergenic	63133	NA	NA	RP6-43L17.1	23	86998300
23:86998758:C:T	ENSG00000271205	intergenic	20520	NA	NA	RP1-138A5.2	23	86998758
23:86998758:C:T	ENSG00000270446	intergenic	62675	NA	NA	RP6-43L17.1	23	86998758
23:87000231:C:T	ENSG00000271205	intergenic	21993	NA	NA	RP1-138A5.2	23	87000231
23:87000231:C:T	ENSG00000270446	intergenic	61202	NA	NA	RP6-43L17.1	23	87000231
23:87001829:A:G	ENSG00000271205	intergenic	23591	NA	NA	RP1-138A5.2	23	87001829
23:87001829:A:G	ENSG00000270446	intergenic	59604	NA	NA	RP6-43L17.1	23	87001829
23:87001964:C:CAAAAA	ENSG00000271205	intergenic	23726	NA	NA	RP1-138A5.2	23	87001964
23:87001964:C:CAAAAA	ENSG00000270446	intergenic	59464	NA	NA	RP6-43L17.1	23	87001964
23:87002441:A:G	ENSG00000271205	intergenic	24203	NA	NA	RP1-138A5.2	23	87002441
23:87002441:A:G	ENSG00000270446	intergenic	58992	NA	NA	RP6-43L17.1	23	87002441
23:87002459:C:CTTTA	ENSG00000271205	intergenic	24221	NA	NA	RP1-138A5.2	23	87002459
23:87002459:C:CTTTA	ENSG00000270446	intergenic	58974	NA	NA	RP6-43L17.1	23	87002459
23:87002477:C:T	ENSG00000271205	intergenic	24239	NA	NA	RP1-138A5.2	23	87002477
23:87002477:C:T	ENSG00000270446	intergenic	58956	NA	NA	RP6-43L17.1	23	87002477
23:87002509:A:G	ENSG00000271205	intergenic	24271	NA	NA	RP1-138A5.2	23	87002509
23:87002509:A:G	ENSG00000270446	intergenic	58924	NA	NA	RP6-43L17.1	23	87002509
23:87002592:A:G	ENSG00000271205	intergenic	24354	NA	NA	RP1-138A5.2	23	87002592
23:87002592:A:G	ENSG00000270446	intergenic	58841	NA	NA	RP6-43L17.1	23	87002592
23:87002666:A:G	ENSG00000271205	intergenic	24428	NA	NA	RP1-138A5.2	23	87002666
23:87002666:A:G	ENSG00000270446	intergenic	58767	NA	NA	RP6-43L17.1	23	87002666
23:87002770:A:G	ENSG00000271205	intergenic	24532	NA	NA	RP1-138A5.2	23	87002770
23:87002770:A:G	ENSG00000270446	intergenic	58663	NA	NA	RP6-43L17.1	23	87002770
23:87002857:C:T	ENSG00000271205	intergenic	24619	NA	NA	RP1-138A5.2	23	87002857
23:87002857:C:T	ENSG00000270446	intergenic	58576	NA	NA	RP6-43L17.1	23	87002857
23:87003085:G:T	ENSG00000271205	intergenic	24847	NA	NA	RP1-138A5.2	23	87003085
23:87003085:G:T	ENSG00000270446	intergenic	58348	NA	NA	RP6-43L17.1	23	87003085
23:87003675:C:T	ENSG00000271205	intergenic	25437	NA	NA	RP1-138A5.2	23	87003675
23:87003675:C:T	ENSG00000270446	intergenic	57758	NA	NA	RP6-43L17.1	23	87003675
23:87003837:G:T	ENSG00000271205	intergenic	25599	NA	NA	RP1-138A5.2	23	87003837
23:87003837:G:T	ENSG00000270446	intergenic	57596	NA	NA	RP6-43L17.1	23	87003837
23:87004045:C:T	ENSG00000271205	intergenic	25807	NA	NA	RP1-138A5.2	23	87004045
23:87004045:C:T	ENSG00000270446	intergenic	57388	NA	NA	RP6-43L17.1	23	87004045
23:87005248:C:T	ENSG00000271205	intergenic	27010	NA	NA	RP1-138A5.2	23	87005248
23:87005248:C:T	ENSG00000270446	intergenic	56185	NA	NA	RP6-43L17.1	23	87005248
23:87005307:A:T	ENSG00000271205	intergenic	27069	NA	NA	RP1-138A5.2	23	87005307
23:87005307:A:T	ENSG00000270446	intergenic	56126	NA	NA	RP6-43L17.1	23	87005307
23:87005359:T:TA	ENSG00000271205	intergenic	27121	NA	NA	RP1-138A5.2	23	87005359
23:87005359:T:TA	ENSG00000270446	intergenic	56074	NA	NA	RP6-43L17.1	23	87005359
23:87005745:A:T	ENSG00000271205	intergenic	27507	NA	NA	RP1-138A5.2	23	87005745
23:87005745:A:T	ENSG00000270446	intergenic	55688	NA	NA	RP6-43L17.1	23	87005745
23:87007813:C:T	ENSG00000271205	intergenic	29575	NA	NA	RP1-138A5.2	23	87007813
23:87007813:C:T	ENSG00000270446	intergenic	53620	NA	NA	RP6-43L17.1	23	87007813
23:87007932:A:C	ENSG00000271205	intergenic	29694	NA	NA	RP1-138A5.2	23	87007932
23:87007932:A:C	ENSG00000270446	intergenic	53501	NA	NA	RP6-43L17.1	23	87007932
23:87007979:A:G	ENSG00000271205	intergenic	29741	NA	NA	RP1-138A5.2	23	87007979
23:87007979:A:G	ENSG00000270446	intergenic	53454	NA	NA	RP6-43L17.1	23	87007979
23:87008443:A:G	ENSG00000271205	intergenic	30205	NA	NA	RP1-138A5.2	23	87008443
23:87008443:A:G	ENSG00000270446	intergenic	52990	NA	NA	RP6-43L17.1	23	87008443
23:87009043:C:T	ENSG00000271205	intergenic	30805	NA	NA	RP1-138A5.2	23	87009043
23:87009043:C:T	ENSG00000270446	intergenic	52390	NA	NA	RP6-43L17.1	23	87009043
23:87009080:C:T	ENSG00000271205	intergenic	30842	NA	NA	RP1-138A5.2	23	87009080
23:87009080:C:T	ENSG00000270446	intergenic	52353	NA	NA	RP6-43L17.1	23	87009080
23:87009377:A:C	ENSG00000271205	intergenic	31139	NA	NA	RP1-138A5.2	23	87009377
23:87009377:A:C	ENSG00000270446	intergenic	52056	NA	NA	RP6-43L17.1	23	87009377
23:87009595:C:T	ENSG00000271205	intergenic	31357	NA	NA	RP1-138A5.2	23	87009595
23:87009595:C:T	ENSG00000270446	intergenic	51838	NA	NA	RP6-43L17.1	23	87009595
23:87010172:A:G	ENSG00000271205	intergenic	31934	NA	NA	RP1-138A5.2	23	87010172
23:87010172:A:G	ENSG00000270446	intergenic	51261	NA	NA	RP6-43L17.1	23	87010172
23:87010285:C:T	ENSG00000271205	intergenic	32047	NA	NA	RP1-138A5.2	23	87010285
23:87010285:C:T	ENSG00000270446	intergenic	51148	NA	NA	RP6-43L17.1	23	87010285
23:87010929:A:G	ENSG00000271205	intergenic	32691	NA	NA	RP1-138A5.2	23	87010929
23:87010929:A:G	ENSG00000270446	intergenic	50504	NA	NA	RP6-43L17.1	23	87010929
23:87011640:C:T	ENSG00000271205	intergenic	33402	NA	NA	RP1-138A5.2	23	87011640
23:87011640:C:T	ENSG00000270446	intergenic	49793	NA	NA	RP6-43L17.1	23	87011640
23:87012042:A:G	ENSG00000271205	intergenic	33804	NA	NA	RP1-138A5.2	23	87012042
23:87012042:A:G	ENSG00000270446	intergenic	49391	NA	NA	RP6-43L17.1	23	87012042
23:87012065:A:T	ENSG00000271205	intergenic	33827	NA	NA	RP1-138A5.2	23	87012065
23:87012065:A:T	ENSG00000270446	intergenic	49368	NA	NA	RP6-43L17.1	23	87012065
23:87012319:C:T	ENSG00000271205	intergenic	34081	NA	NA	RP1-138A5.2	23	87012319
23:87012319:C:T	ENSG00000270446	intergenic	49114	NA	NA	RP6-43L17.1	23	87012319
23:87012726:A:C	ENSG00000271205	intergenic	34488	NA	NA	RP1-138A5.2	23	87012726
23:87012726:A:C	ENSG00000270446	intergenic	48707	NA	NA	RP6-43L17.1	23	87012726
23:87012926:C:T	ENSG00000271205	intergenic	34688	NA	NA	RP1-138A5.2	23	87012926
23:87012926:C:T	ENSG00000270446	intergenic	48507	NA	NA	RP6-43L17.1	23	87012926
23:87013335:T:TC	ENSG00000271205	intergenic	35097	NA	NA	RP1-138A5.2	23	87013335
23:87013335:T:TC	ENSG00000270446	intergenic	48098	NA	NA	RP6-43L17.1	23	87013335
23:87013667:A:G	ENSG00000271205	intergenic	35429	NA	NA	RP1-138A5.2	23	87013667
23:87013667:A:G	ENSG00000270446	intergenic	47766	NA	NA	RP6-43L17.1	23	87013667
23:87015008:C:T	ENSG00000271205	intergenic	36770	NA	NA	RP1-138A5.2	23	87015008
23:87015008:C:T	ENSG00000270446	intergenic	46425	NA	NA	RP6-43L17.1	23	87015008
23:87015028:A:G	ENSG00000271205	intergenic	36790	NA	NA	RP1-138A5.2	23	87015028
23:87015028:A:G	ENSG00000270446	intergenic	46405	NA	NA	RP6-43L17.1	23	87015028
23:87015450:A:G	ENSG00000271205	intergenic	37212	NA	NA	RP1-138A5.2	23	87015450
23:87015450:A:G	ENSG00000270446	intergenic	45983	NA	NA	RP6-43L17.1	23	87015450
23:87015553:G:T	ENSG00000271205	intergenic	37315	NA	NA	RP1-138A5.2	23	87015553
23:87015553:G:T	ENSG00000270446	intergenic	45880	NA	NA	RP6-43L17.1	23	87015553
23:87015631:A:G	ENSG00000271205	intergenic	37393	NA	NA	RP1-138A5.2	23	87015631
23:87015631:A:G	ENSG00000270446	intergenic	45802	NA	NA	RP6-43L17.1	23	87015631
23:87015855:A:G	ENSG00000271205	intergenic	37617	NA	NA	RP1-138A5.2	23	87015855
23:87015855:A:G	ENSG00000270446	intergenic	45578	NA	NA	RP6-43L17.1	23	87015855
23:87016051:C:T	ENSG00000271205	intergenic	37813	NA	NA	RP1-138A5.2	23	87016051
23:87016051:C:T	ENSG00000270446	intergenic	45382	NA	NA	RP6-43L17.1	23	87016051
23:87016592:C:T	ENSG00000271205	intergenic	38354	NA	NA	RP1-138A5.2	23	87016592
23:87016592:C:T	ENSG00000270446	intergenic	44841	NA	NA	RP6-43L17.1	23	87016592
23:87016611:A:C	ENSG00000271205	intergenic	38373	NA	NA	RP1-138A5.2	23	87016611
23:87016611:A:C	ENSG00000270446	intergenic	44822	NA	NA	RP6-43L17.1	23	87016611
23:87016695:C:T	ENSG00000271205	intergenic	38457	NA	NA	RP1-138A5.2	23	87016695
23:87016695:C:T	ENSG00000270446	intergenic	44738	NA	NA	RP6-43L17.1	23	87016695
23:87016867:A:C	ENSG00000271205	intergenic	38629	NA	NA	RP1-138A5.2	23	87016867
23:87016867:A:C	ENSG00000270446	intergenic	44566	NA	NA	RP6-43L17.1	23	87016867
23:87017047:C:T	ENSG00000271205	intergenic	38809	NA	NA	RP1-138A5.2	23	87017047
23:87017047:C:T	ENSG00000270446	intergenic	44386	NA	NA	RP6-43L17.1	23	87017047
23:87017561:C:T	ENSG00000271205	intergenic	39323	NA	NA	RP1-138A5.2	23	87017561
23:87017561:C:T	ENSG00000270446	intergenic	43872	NA	NA	RP6-43L17.1	23	87017561
23:87018071:A:G	ENSG00000271205	intergenic	39833	NA	NA	RP1-138A5.2	23	87018071
23:87018071:A:G	ENSG00000270446	intergenic	43362	NA	NA	RP6-43L17.1	23	87018071
23:87018153:A:G	ENSG00000271205	intergenic	39915	NA	NA	RP1-138A5.2	23	87018153
23:87018153:A:G	ENSG00000270446	intergenic	43280	NA	NA	RP6-43L17.1	23	87018153
23:87018220:C:CA	ENSG00000271205	intergenic	39982	NA	NA	RP1-138A5.2	23	87018220
23:87018220:C:CA	ENSG00000270446	intergenic	43213	NA	NA	RP6-43L17.1	23	87018220
23:87018634:C:T	ENSG00000271205	intergenic	40396	NA	NA	RP1-138A5.2	23	87018634
23:87018634:C:T	ENSG00000270446	intergenic	42799	NA	NA	RP6-43L17.1	23	87018634
23:87018651:A:C	ENSG00000271205	intergenic	40413	NA	NA	RP1-138A5.2	23	87018651
23:87018651:A:C	ENSG00000270446	intergenic	42782	NA	NA	RP6-43L17.1	23	87018651
23:87019352:C:T	ENSG00000271205	intergenic	41114	NA	NA	RP1-138A5.2	23	87019352
23:87019352:C:T	ENSG00000270446	intergenic	42081	NA	NA	RP6-43L17.1	23	87019352
23:87020614:A:G	ENSG00000271205	intergenic	42376	NA	NA	RP1-138A5.2	23	87020614
23:87020614:A:G	ENSG00000270446	intergenic	40819	NA	NA	RP6-43L17.1	23	87020614
23:87021726:C:T	ENSG00000271205	intergenic	43488	NA	NA	RP1-138A5.2	23	87021726
23:87021726:C:T	ENSG00000270446	intergenic	39707	NA	NA	RP6-43L17.1	23	87021726
23:87022567:C:T	ENSG00000271205	intergenic	44329	NA	NA	RP1-138A5.2	23	87022567
23:87022567:C:T	ENSG00000270446	intergenic	38866	NA	NA	RP6-43L17.1	23	87022567
23:87023031:A:G	ENSG00000271205	intergenic	44793	NA	NA	RP1-138A5.2	23	87023031
23:87023031:A:G	ENSG00000270446	intergenic	38402	NA	NA	RP6-43L17.1	23	87023031
23:87023039:G:T	ENSG00000271205	intergenic	44801	NA	NA	RP1-138A5.2	23	87023039
23:87023039:G:T	ENSG00000270446	intergenic	38394	NA	NA	RP6-43L17.1	23	87023039
23:87024935:A:G	ENSG00000271205	intergenic	46697	NA	NA	RP1-138A5.2	23	87024935
23:87024935:A:G	ENSG00000270446	intergenic	36498	NA	NA	RP6-43L17.1	23	87024935
23:87025573:C:T	ENSG00000271205	intergenic	47335	NA	NA	RP1-138A5.2	23	87025573
23:87025573:C:T	ENSG00000270446	intergenic	35860	NA	NA	RP6-43L17.1	23	87025573
23:87025705:C:T	ENSG00000271205	intergenic	47467	NA	NA	RP1-138A5.2	23	87025705
23:87025705:C:T	ENSG00000270446	intergenic	35728	NA	NA	RP6-43L17.1	23	87025705
23:87026397:A:T	ENSG00000271205	intergenic	48159	NA	NA	RP1-138A5.2	23	87026397
23:87026397:A:T	ENSG00000270446	intergenic	35036	NA	NA	RP6-43L17.1	23	87026397
23:87026402:A:C	ENSG00000271205	intergenic	48164	NA	NA	RP1-138A5.2	23	87026402
23:87026402:A:C	ENSG00000270446	intergenic	35031	NA	NA	RP6-43L17.1	23	87026402
23:87026692:C:T	ENSG00000271205	intergenic	48454	NA	NA	RP1-138A5.2	23	87026692
23:87026692:C:T	ENSG00000270446	intergenic	34741	NA	NA	RP6-43L17.1	23	87026692
23:87026753:G:GT	ENSG00000271205	intergenic	48515	NA	NA	RP1-138A5.2	23	87026753
23:87026753:G:GT	ENSG00000270446	intergenic	34679	NA	NA	RP6-43L17.1	23	87026753
23:87026954:A:G	ENSG00000271205	intergenic	48716	NA	NA	RP1-138A5.2	23	87026954
23:87026954:A:G	ENSG00000270446	intergenic	34479	NA	NA	RP6-43L17.1	23	87026954
23:87027312:A:AAT	ENSG00000271205	intergenic	49074	NA	NA	RP1-138A5.2	23	87027312
23:87027312:A:AAT	ENSG00000270446	intergenic	34119	NA	NA	RP6-43L17.1	23	87027312
23:87027478:AGTGTATTAACTATCATATAGTTAATAA:TGTGTATTAACTATCATATAGTTAATAA	ENSG00000271205	intergenic	49240	NA	NA	RP1-138A5.2	23	87027478
23:87027478:AGTGTATTAACTATCATATAGTTAATAA:TGTGTATTAACTATCATATAGTTAATAA	ENSG00000270446	intergenic	33928	NA	NA	RP6-43L17.1	23	87027478
23:87027478:T:TGTGTATTAACTATCATATAGTTAATAA	ENSG00000271205	intergenic	49240	NA	NA	RP1-138A5.2	23	87027478
23:87027478:T:TGTGTATTAACTATCATATAGTTAATAA	ENSG00000270446	intergenic	33928	NA	NA	RP6-43L17.1	23	87027478
23:87027524:A:G	ENSG00000271205	intergenic	49286	NA	NA	RP1-138A5.2	23	87027524
23:87027524:A:G	ENSG00000270446	intergenic	33909	NA	NA	RP6-43L17.1	23	87027524
23:87027532:A:T	ENSG00000271205	intergenic	49294	NA	NA	RP1-138A5.2	23	87027532
23:87027532:A:T	ENSG00000270446	intergenic	33901	NA	NA	RP6-43L17.1	23	87027532
23:87027542:A:C	ENSG00000271205	intergenic	49304	NA	NA	RP1-138A5.2	23	87027542
23:87027542:A:C	ENSG00000270446	intergenic	33891	NA	NA	RP6-43L17.1	23	87027542
23:87028023:A:C	ENSG00000271205	intergenic	49785	NA	NA	RP1-138A5.2	23	87028023
23:87028023:A:C	ENSG00000270446	intergenic	33410	NA	NA	RP6-43L17.1	23	87028023
23:87028701:A:T	ENSG00000271205	intergenic	50463	NA	NA	RP1-138A5.2	23	87028701
23:87028701:A:T	ENSG00000270446	intergenic	32732	NA	NA	RP6-43L17.1	23	87028701
23:87028756:A:T	ENSG00000271205	intergenic	50518	NA	NA	RP1-138A5.2	23	87028756
23:87028756:A:T	ENSG00000270446	intergenic	32677	NA	NA	RP6-43L17.1	23	87028756
23:87028848:A:G	ENSG00000271205	intergenic	50610	NA	NA	RP1-138A5.2	23	87028848
23:87028848:A:G	ENSG00000270446	intergenic	32585	NA	NA	RP6-43L17.1	23	87028848
23:87028907:C:T	ENSG00000271205	intergenic	50669	NA	NA	RP1-138A5.2	23	87028907
23:87028907:C:T	ENSG00000270446	intergenic	32526	NA	NA	RP6-43L17.1	23	87028907
23:87028977:C:T	ENSG00000271205	intergenic	50739	NA	NA	RP1-138A5.2	23	87028977
23:87028977:C:T	ENSG00000270446	intergenic	32456	NA	NA	RP6-43L17.1	23	87028977
23:87046947:A:ATATCT	ENSG00000271205	intergenic	68709	NA	NA	RP1-138A5.2	23	87046947
23:87046947:A:ATATCT	ENSG00000270446	intergenic	14481	NA	NA	RP6-43L17.1	23	87046947
23:87066298:A:C	ENSG00000271056	intergenic	1415	NA	NA	RP6-43L17.2	23	87066298
23:87066298:A:C	ENSG00000230706	intergenic	250293	NA	NA	RP5-998G20.1	23	87066298
23:87087095:A:T	ENSG00000271056	intergenic	22212	NA	NA	RP6-43L17.2	23	87087095
23:87087095:A:T	ENSG00000230706	intergenic	229496	NA	NA	RP5-998G20.1	23	87087095
23:87325873:C:T	ENSG00000230706	intergenic	8028	NA	NA	RP5-998G20.1	23	87325873
23:87325873:C:T	ENSG00000230956	intergenic	25521	NA	NA	RP3-452M16.1	23	87325873

## Sheet: AppendixA-ST7_genes
ensg	symbol	chr	start	end	strand	type	entrezID	HUGO	pLI	ncRVIS	eqtlMapSNPs	eqtlMapminP	eqtlMapminQ	eqtlMapts	eqtlDirection	minGwasP	IndSigSNPs	GenomicLocus
ENSG00000223653	RP11-131L23.1	1	85742398	85913807	1	antisense	NA	NA	NA	NA	3	3.04e-05	3.49e-07	GTEx/v8/Brain_Cerebellum:GTEx/v8/Skin_Sun_Exposed_Lower_leg	+	9.2e-08	rs7554669	1
ENSG00000153904	DDAH1	1	85784164	86043933	-1	protein_coding	23576	DDAH1	0.168277	0.407834	1	2.53e-06	1.84e-32	GTEx/v8/Liver	-	0.00669743	rs7554669	1
ENSG00000213063	RPL29P7	1	168907705	168908161	1	pseudogene	NA	RPL29P7	NA	NA	1	7.25e-05	5.83e-30	GTEx/v8/Testis	+	2.18e-05	rs12729624;rs10800400	2
ENSG00000143153	ATP1B1	1	169074935	169101960	1	protein_coding	481	ATP1B1	0.995565	0.638257	2	4.33e-06	0.0269559	GTEx/v8/Minor_Salivary_Gland	-	3.06e-05	rs12729624;rs10800400	2
ENSG00000213062	AL021068.1	1	169455380	169456846	1	pseudogene	NA	NA	NA	NA	20	NA	0.049	CMC_SVA_cis	+	1.06e-05	rs12729624;rs10800400	2
ENSG00000198734	F5	1	169483404	169555826	-1	protein_coding	2153	F5	4.69e-08	0.218629	1	0.00025941	2.53e-13	GTEx/v8/Skin_Sun_Exposed_Lower_leg	+	0.00202417	rs10800400	2
ENSG00000152904	GGPS1	1	235490665	235507847	1	protein_coding	9453	GGPS1	0.66663	0.869877	7	4.57e-08	1.91e-15	GTEx/v8/Lung:GTEx/v8/Nerve_Tibial	-	2.52e-06	rs114029967	3
ENSG00000116957	TBCE	1	235530675	235612283	1	protein_coding	6905	TBCE	6.29e-07	-0.091722	1	5.98e-05	1.21e-05	GTEx/v8/Heart_Atrial_Appendage	NA	NA	rs114029967	3
ENSG00000162885	B3GALNT2	1	235613238	235667781	-1	protein_coding	148789	B3GALNT2	4.87e-06	NA	7	5.96e-05	3.65e-25	GTEx/v8/Thyroid	+	2.52e-06	rs114029967	3
ENSG00000175928	LRRN1	3	3841121	3889387	1	protein_coding	57633	LRRN1	0.876589	0.073688	1	2.93e-05	0.0461512	GTEx/v8/Skin_Not_Sun_Exposed_Suprapubic	-	0.00041536	rs116481454	4
ENSG00000248727	CTC-236F12.4	5	55753622	55777773	-1	protein_coding	NA	NA	NA	NA	1	0.000193803	0.0172817	GTEx/v8/Thyroid	+	2.52e-06	rs16885512	7
ENSG00000253295	RP11-779O18.1	5	172185229	172189559	1	antisense	NA	NA	NA	NA	5	4.78e-05	0.0165984	GTEx/v8/Skin_Sun_Exposed_Lower_leg	+	5.12e-06	rs3805476;rs12520750	9
ENSG00000213386	RP11-779O18.2	5	172189524	172190261	-1	pseudogene	NA	NA	NA	NA	15	1.89e-07	0.000191849	GTEx/v8/Artery_Tibial	-	4.35e-07	rs3805476;rs12520750	9
ENSG00000253736	RP11-779O18.3	5	172189983	172204777	1	antisense	NA	NA	NA	NA	14	2.21e-06	1.18e-10	GTEx/v8/Whole_Blood:GTEx/v8/Spleen:GTEx/v8/Testis	-	4.35e-07	rs3805476;rs12520750	9
ENSG00000112685	EXOC2	6	485133	693117	-1	protein_coding	55770	EXOC2	0.000114966	-0.462649	2	9.5e-06	6.25e-46	PsychENCODE_eQTLs:CMC_SVA_cis:GTEx/v8/Esophagus_Mucosa:GTEx/v8/Muscle_Skeletal:GTEx/v8/Cells_Cultured_fibroblasts	+	0.00220315	rs6904638	10
ENSG00000272463	RP11-532F6.3	6	708592	711405	-1	lincRNA	NA	NA	NA	NA	1	0.000429412	0.029156	PsychENCODE_eQTLs	-	0.00392566	rs6904638	10
ENSG00000242616	GNG10	9	114423615	114432526	1	protein_coding	2790	GNG10	0.00031015	-0.0627287	2	1.08e-05	1.15e-91	PsychENCODE_eQTLs:GTEx/v8/Artery_Tibial:GTEx/v8/Esophagus_Muscularis:GTEx/v8/Muscle_Skeletal:GTEx/v8/Nerve_Tibial:GTEx/v8/Thyroid	+	6.06e-06	rs189639877;rs143824048	13
ENSG00000259295	CSPG4P12	15	85734669	85757136	1	pseudogene	440300	CSPG4P12	NA	NA	4	3.76e-07	3.48e-72	GTEx/v8/Muscle_Skeletal	-	7.34e-06	rs4572341	17
ENSG00000229212	RP11-561C5.4	15	85747141	85778026	-1	pseudogene	101929479	NA	NA	NA	4	2.78e-08	1.7e-35	PsychENCODE_eQTLs:GTEx/v8/Adipose_Visceral_Omentum:GTEx/v8/Lung:GTEx/v8/Muscle_Skeletal	-	7.34e-06	rs4572341	17
ENSG00000259630	CTD-2262B20.1	15	85958459	85958864	1	pseudogene	NA	NA	NA	NA	1	1.84e-05	2.66e-25	GTEx/v8/Skin_Not_Sun_Exposed_Suprapubic	NA	NA	rs4572341	17
ENSG00000259276	RP11-815J21.3	15	86164495	86170920	-1	antisense	NA	NA	NA	NA	3	4.11e-06	5.78e-81	GTEx/v8/Testis	-	7.34e-06	rs4572341	17
ENSG00000259762	RP11-158M2.4	15	86293567	86296132	-1	antisense	NA	NA	NA	NA	2	2.68e-05	4.87e-11	GTEx/v8/Esophagus_Mucosa:GTEx/v8/Skin_Sun_Exposed_Lower_leg	+	4.94e-05	rs4572341	17
ENSG00000259416	RP11-158M2.5	15	86298172	86299468	-1	antisense	101929679	NA	NA	NA	4	2.72e-06	1.83e-36	GTEx/v8/Skin_Sun_Exposed_Lower_leg:GTEx/v8/Testis	+	7.34e-06	rs4572341	17

## Sheet: AppendixA-ST8_eQTL
uniqID	db	tissue	gene	testedAllele	p	signed_stats	FDR	RiskIncAllele	alignedDirection	chr	pos	symbol	eqtlMapFilt
6:528736:G:T	PsychENCODE	PsychENCODE_eQTLs	ENSG00000112685	T	0.000357756	-0.0444385	0.025039	G	+	6	528736	EXOC2	1
6:528736:G:T	PsychENCODE	PsychENCODE_eQTLs	ENSG00000272463	T	0.000429412	0.0869699	0.029156	G	-	6	528736	RP11-532F6.3	1
9:114435160:G:T	PsychENCODE	PsychENCODE_eQTLs	ENSG00000242616	G	0.000508861	0.173516	0.0335262	G	+	9	114435160	GNG10	1
15:86003010:A:G	PsychENCODE	PsychENCODE_eQTLs	ENSG00000229212	A	2.78e-08	-0.184305	4.84e-06	A	-	15	86003010	RP11-561C5.4	1
1:168933787:C:T	CMC	CMC_SVA_cis	ENSG00000213062	C	NA	1	0.049	C	+	1	168933787	AL021068.1	1
1:168939789:A:G	CMC	CMC_SVA_cis	ENSG00000213062	A	NA	1	0.049	A	+	1	168939789	AL021068.1	1
1:168940355:C:T	CMC	CMC_SVA_cis	ENSG00000213062	T	NA	1	0.049	T	+	1	168940355	AL021068.1	1
1:168942529:C:T	CMC	CMC_SVA_cis	ENSG00000213062	T	NA	1	0.049	T	+	1	168942529	AL021068.1	1
1:168944014:A:C	CMC	CMC_SVA_cis	ENSG00000213062	A	NA	1	0.049	A	+	1	168944014	AL021068.1	1
1:168944894:A:G	CMC	CMC_SVA_cis	ENSG00000213062	A	NA	1	0.049	A	+	1	168944894	AL021068.1	1
1:168949222:C:T	CMC	CMC_SVA_cis	ENSG00000213062	C	NA	1	0.049	C	+	1	168949222	AL021068.1	1
1:168953088:A:G	CMC	CMC_SVA_cis	ENSG00000213062	G	NA	1	0.049	G	+	1	168953088	AL021068.1	1
1:168954614:C:T	CMC	CMC_SVA_cis	ENSG00000213062	T	NA	1	0.049	T	+	1	168954614	AL021068.1	1
1:168957080:A:G	CMC	CMC_SVA_cis	ENSG00000213062	G	NA	1	0.049	G	+	1	168957080	AL021068.1	1
1:168959049:A:G	CMC	CMC_SVA_cis	ENSG00000213062	A	NA	1	0.049	A	+	1	168959049	AL021068.1	1
1:168959055:A:T	CMC	CMC_SVA_cis	ENSG00000213062	T	NA	1	0.049	T	+	1	168959055	AL021068.1	1
1:168962922:C:T	CMC	CMC_SVA_cis	ENSG00000213062	T	NA	1	0.049	T	+	1	168962922	AL021068.1	1
1:168965252:G:T	CMC	CMC_SVA_cis	ENSG00000213062	G	NA	1	0.049	G	+	1	168965252	AL021068.1	1
1:168967723:A:C	CMC	CMC_SVA_cis	ENSG00000213062	A	NA	1	0.049	A	+	1	168967723	AL021068.1	1
1:168969833:C:T	CMC	CMC_SVA_cis	ENSG00000213062	T	NA	1	0.049	T	+	1	168969833	AL021068.1	1
1:168973635:C:T	CMC	CMC_SVA_cis	ENSG00000213062	C	NA	1	0.049	C	+	1	168973635	AL021068.1	1
1:168975869:C:T	CMC	CMC_SVA_cis	ENSG00000213062	T	NA	1	0.049	T	+	1	168975869	AL021068.1	1
1:168976816:A:G	CMC	CMC_SVA_cis	ENSG00000213062	G	NA	1	0.049	G	+	1	168976816	AL021068.1	1
1:168979764:C:G	CMC	CMC_SVA_cis	ENSG00000213062	G	NA	1	0.049	G	+	1	168979764	AL021068.1	1
6:528736:G:T	CMC	CMC_SVA_cis	ENSG00000112685	G	NA	1	0.009	G	+	6	528736	EXOC2	1
6:544239:C:G	CMC	CMC_SVA_cis	ENSG00000112685	G	NA	1	0.009	G	+	6	544239	EXOC2	1
15:86003010:A:G	GTEx/v8	Adipose_Visceral_Omentum	ENSG00000229212	A	4.69e-05	-0.354789	4.17e-19	A	-	15	86003010	RP11-561C5.4	1
5:172195092:A:G	GTEx/v8	Whole_Blood	ENSG00000253736	A	5.17e-05	-0.168414	1.18e-10	A	-	5	172195092	RP11-779O18.3	1
5:172196997:C:T	GTEx/v8	Whole_Blood	ENSG00000253736	C	6.62e-05	-0.166782	1.18e-10	C	-	5	172196997	RP11-779O18.3	1
5:172199366:A:G	GTEx/v8	Whole_Blood	ENSG00000253736	A	7.71e-05	-0.168853	1.18e-10	A	-	5	172199366	RP11-779O18.3	1
5:172199964:T:TTA	GTEx/v8	Whole_Blood	ENSG00000253736	T	7.32e-05	-0.17071	1.18e-10	NA	NA	5	172199964	RP11-779O18.3	1
5:172195092:A:G	GTEx/v8	Artery_Tibial	ENSG00000213386	A	5.33e-07	-0.296881	0.000191849	A	-	5	172195092	RP11-779O18.2	1
5:172196997:C:T	GTEx/v8	Artery_Tibial	ENSG00000213386	C	5.12e-07	-0.301763	0.000191849	C	-	5	172196997	RP11-779O18.2	1
5:172199366:A:G	GTEx/v8	Artery_Tibial	ENSG00000213386	A	1.89e-07	-0.320305	0.000191849	A	-	5	172199366	RP11-779O18.2	1
5:172199623:A:G	GTEx/v8	Artery_Tibial	ENSG00000213386	A	2.61e-05	-0.250017	0.000191849	A	-	5	172199623	RP11-779O18.2	1
5:172199964:T:TTA	GTEx/v8	Artery_Tibial	ENSG00000213386	T	1.23e-06	-0.30765	0.000191849	NA	NA	5	172199964	RP11-779O18.2	1
5:172200059:T:TG	GTEx/v8	Artery_Tibial	ENSG00000213386	TG	4.19e-07	-0.319731	0.000191849	NA	NA	5	172200059	RP11-779O18.2	1
5:172201901:C:T	GTEx/v8	Artery_Tibial	ENSG00000213386	T	1.42e-06	-0.300906	0.000191849	T	-	5	172201901	RP11-779O18.2	1
5:172203148:C:G	GTEx/v8	Artery_Tibial	ENSG00000213386	C	1.42e-06	-0.300906	0.000191849	C	-	5	172203148	RP11-779O18.2	1
5:172203886:C:G	GTEx/v8	Artery_Tibial	ENSG00000213386	C	1.02e-06	-0.308488	0.000191849	C	-	5	172203886	RP11-779O18.2	1
5:172203892:C:G	GTEx/v8	Artery_Tibial	ENSG00000213386	G	1.02e-06	-0.308488	0.000191849	G	-	5	172203892	RP11-779O18.2	1
5:172204629:C:T	GTEx/v8	Artery_Tibial	ENSG00000213386	T	6.18e-07	-0.314005	0.000191849	T	-	5	172204629	RP11-779O18.2	1
5:172206412:A:G	GTEx/v8	Artery_Tibial	ENSG00000213386	A	6.18e-07	-0.314005	0.000191849	A	-	5	172206412	RP11-779O18.2	1
5:172209023:A:G	GTEx/v8	Artery_Tibial	ENSG00000213386	A	4.18e-05	-0.245448	0.000191849	A	-	5	172209023	RP11-779O18.2	1
5:172213709:A:G	GTEx/v8	Artery_Tibial	ENSG00000213386	A	3.08e-05	-0.260205	0.000191849	A	-	5	172213709	RP11-779O18.2	1
5:172213922:A:G	GTEx/v8	Artery_Tibial	ENSG00000213386	G	0.000106911	-0.243371	0.000191849	G	-	5	172213922	RP11-779O18.2	1
9:114435160:G:T	GTEx/v8	Artery_Tibial	ENSG00000242616	G	0.000109127	0.480974	1.53e-86	G	+	9	114435160	GNG10	1
9:114591558:A:G	GTEx/v8	Artery_Tibial	ENSG00000242616	A	4.13e-05	0.520258	1.53e-86	A	+	9	114591558	GNG10	1
1:85855098:A:T	GTEx/v8	Brain_Cerebellum	ENSG00000223653	A	3.04e-05	0.334621	0.0125237	A	+	1	85855098	RP11-131L23.1	1
1:85880933:A:G	GTEx/v8	Brain_Cerebellum	ENSG00000223653	A	6.12e-05	-0.395003	0.0125237	G	+	1	85880933	RP11-131L23.1	1
1:85898330:A:G	GTEx/v8	Brain_Cerebellum	ENSG00000223653	G	4.22e-05	-0.396552	0.0125237	A	+	1	85898330	RP11-131L23.1	1
6:544239:C:G	GTEx/v8	Esophagus_Mucosa	ENSG00000112685	C	1.53e-05	-0.147672	1.39e-27	G	+	6	544239	EXOC2	1
15:86004340:A:AATTTT	GTEx/v8	Esophagus_Mucosa	ENSG00000259762	AATTTT	2.68e-05	0.338881	0.000147689	NA	NA	15	86004340	RP11-158M2.4	1
9:114435160:G:T	GTEx/v8	Esophagus_Muscularis	ENSG00000242616	G	0.000152864	0.544233	7.59e-63	G	+	9	114435160	GNG10	1
9:114591558:A:G	GTEx/v8	Esophagus_Muscularis	ENSG00000242616	A	0.000152864	0.544233	7.59e-63	A	+	9	114591558	GNG10	1
1:235389777:A:G	GTEx/v8	Heart_Atrial_Appendage	ENSG00000116957	A	5.98e-05	-0.636614	1.21e-05	NA	NA	1	235389777	TBCE	1
1:85855098:A:T	GTEx/v8	Liver	ENSG00000153904	A	2.53e-06	-0.398323	1.84e-32	A	-	1	85855098	DDAH1	1
1:235389777:A:G	GTEx/v8	Lung	ENSG00000152904	A	2.14e-05	0.422955	6.05e-13	NA	NA	1	235389777	GGPS1	1
1:235409403:C:G	GTEx/v8	Lung	ENSG00000152904	C	4.57e-08	0.426878	6.05e-13	G	-	1	235409403	GGPS1	1
1:235433577:A:G	GTEx/v8	Lung	ENSG00000152904	A	4.57e-08	0.426878	6.05e-13	G	-	1	235433577	GGPS1	1
1:235439317:C:T	GTEx/v8	Lung	ENSG00000152904	C	4.57e-08	0.426878	6.05e-13	T	-	1	235439317	GGPS1	1
1:235460820:C:T	GTEx/v8	Lung	ENSG00000152904	T	4.57e-08	0.426878	6.05e-13	C	-	1	235460820	GGPS1	1
1:235461945:C:T	GTEx/v8	Lung	ENSG00000152904	T	4.57e-08	0.426878	6.05e-13	C	-	1	235461945	GGPS1	1
1:235466742:C:T	GTEx/v8	Lung	ENSG00000152904	T	4.57e-08	0.426878	6.05e-13	C	-	1	235466742	GGPS1	1
15:85996416:G:T	GTEx/v8	Lung	ENSG00000229212	T	1.72e-05	-0.383861	1.7e-35	T	-	15	85996416	RP11-561C5.4	1
15:86003010:A:G	GTEx/v8	Lung	ENSG00000229212	A	6.75e-06	-0.337559	1.7e-35	A	-	15	86003010	RP11-561C5.4	1
15:86004340:A:AATTTT	GTEx/v8	Lung	ENSG00000229212	AATTTT	3.22e-05	-0.273567	1.7e-35	NA	NA	15	86004340	RP11-561C5.4	1
15:86010345:A:C	GTEx/v8	Lung	ENSG00000229212	C	1.32e-05	-0.386925	1.7e-35	C	-	15	86010345	RP11-561C5.4	1
6:528736:G:T	GTEx/v8	Muscle_Skeletal	ENSG00000112685	T	5.18e-05	-0.123769	6.25e-46	G	+	6	528736	EXOC2	1
9:114591558:A:G	GTEx/v8	Muscle_Skeletal	ENSG00000242616	A	0.000165315	0.454294	1.57e-17	A	+	9	114591558	GNG10	1
15:85996416:G:T	GTEx/v8	Muscle_Skeletal	ENSG00000229212	T	0.000199382	-0.320247	8.66e-33	T	-	15	85996416	RP11-561C5.4	1
15:85996416:G:T	GTEx/v8	Muscle_Skeletal	ENSG00000259295	T	3.76e-07	-0.470305	3.48e-72	T	-	15	85996416	CSPG4P12	1
15:86003010:A:G	GTEx/v8	Muscle_Skeletal	ENSG00000259295	A	6.6e-06	-0.351659	3.48e-72	A	-	15	86003010	CSPG4P12	1
15:86004340:A:AATTTT	GTEx/v8	Muscle_Skeletal	ENSG00000259295	AATTTT	1.23e-06	-0.340925	3.48e-72	NA	NA	15	86004340	CSPG4P12	1
15:86010345:A:C	GTEx/v8	Muscle_Skeletal	ENSG00000259295	C	1e-06	-0.457587	3.48e-72	C	-	15	86010345	CSPG4P12	1
1:235409403:C:G	GTEx/v8	Nerve_Tibial	ENSG00000152904	C	0.000116061	0.365099	1.91e-15	G	-	1	235409403	GGPS1	1
1:235433577:A:G	GTEx/v8	Nerve_Tibial	ENSG00000152904	A	0.000116061	0.365099	1.91e-15	G	-	1	235433577	GGPS1	1
1:235439317:C:T	GTEx/v8	Nerve_Tibial	ENSG00000152904	C	0.000116061	0.365099	1.91e-15	T	-	1	235439317	GGPS1	1
1:235460820:C:T	GTEx/v8	Nerve_Tibial	ENSG00000152904	T	0.000116061	0.365099	1.91e-15	C	-	1	235460820	GGPS1	1
1:235461945:C:T	GTEx/v8	Nerve_Tibial	ENSG00000152904	T	0.000116061	0.365099	1.91e-15	C	-	1	235461945	GGPS1	1
1:235466742:C:T	GTEx/v8	Nerve_Tibial	ENSG00000152904	T	0.000116061	0.365099	1.91e-15	C	-	1	235466742	GGPS1	1
9:114435160:G:T	GTEx/v8	Nerve_Tibial	ENSG00000242616	G	1.08e-05	0.571762	1.15e-91	G	+	9	114435160	GNG10	1
9:114591558:A:G	GTEx/v8	Nerve_Tibial	ENSG00000242616	A	1.2e-05	0.588999	1.15e-91	A	+	9	114591558	GNG10	1
1:168975869:C:T	GTEx/v8	Minor_Salivary_Gland	ENSG00000143153	T	1.62e-05	-0.298439	0.0269559	T	-	1	168975869	ATP1B1	1
1:168976816:A:G	GTEx/v8	Minor_Salivary_Gland	ENSG00000143153	G	4.33e-06	-0.314386	0.0269559	G	-	1	168976816	ATP1B1	1
6:528736:G:T	GTEx/v8	Cells_Cultured_fibroblasts	ENSG00000112685	T	1.95e-05	-0.184577	5.27e-42	G	+	6	528736	EXOC2	1
6:544239:C:G	GTEx/v8	Cells_Cultured_fibroblasts	ENSG00000112685	C	9.5e-06	-0.189381	5.27e-42	G	+	6	544239	EXOC2	1
3:3678700:C:T	GTEx/v8	Skin_Not_Sun_Exposed_Suprapubic	ENSG00000175928	C	2.93e-05	-0.311273	0.0461512	C	-	3	3678700	LRRN1	1
15:86004340:A:AATTTT	GTEx/v8	Skin_Not_Sun_Exposed_Suprapubic	ENSG00000259630	AATTTT	1.84e-05	0.298233	2.66e-25	NA	NA	15	86004340	CTD-2262B20.1	1
1:85880933:A:G	GTEx/v8	Skin_Sun_Exposed_Lower_leg	ENSG00000223653	A	9.5e-05	-0.255543	3.49e-07	G	+	1	85880933	RP11-131L23.1	1
1:85898330:A:G	GTEx/v8	Skin_Sun_Exposed_Lower_leg	ENSG00000223653	G	0.000239239	-0.241118	3.49e-07	A	+	1	85898330	RP11-131L23.1	1
1:168945225:G:T	GTEx/v8	Skin_Sun_Exposed_Lower_leg	ENSG00000198734	T	0.00025941	0.0975636	2.53e-13	T	+	1	168945225	F5	1
5:172199366:A:G	GTEx/v8	Skin_Sun_Exposed_Lower_leg	ENSG00000253295	A	7.54e-05	0.251476	0.0165984	A	+	5	172199366	RP11-779O18.1	1
5:172204629:C:T	GTEx/v8	Skin_Sun_Exposed_Lower_leg	ENSG00000253295	T	0.000106452	0.245631	0.0165984	T	+	5	172204629	RP11-779O18.1	1
5:172206412:A:G	GTEx/v8	Skin_Sun_Exposed_Lower_leg	ENSG00000253295	A	0.000114275	0.242653	0.0165984	A	+	5	172206412	RP11-779O18.1	1
5:172217882:A:G	GTEx/v8	Skin_Sun_Exposed_Lower_leg	ENSG00000253295	A	4.78e-05	0.265382	0.0165984	A	+	5	172217882	RP11-779O18.1	1
5:172218380:A:G	GTEx/v8	Skin_Sun_Exposed_Lower_leg	ENSG00000253295	G	5.89e-05	0.249111	0.0165984	G	+	5	172218380	RP11-779O18.1	1
15:85996416:G:T	GTEx/v8	Skin_Sun_Exposed_Lower_leg	ENSG00000259416	T	0.000214326	0.343432	3.46e-14	T	+	15	85996416	RP11-158M2.5	1
15:86004340:A:AATTTT	GTEx/v8	Skin_Sun_Exposed_Lower_leg	ENSG00000259416	AATTTT	0.000147827	0.260212	3.46e-14	NA	NA	15	86004340	RP11-158M2.5	1
15:86010345:A:C	GTEx/v8	Skin_Sun_Exposed_Lower_leg	ENSG00000259416	C	8.41e-05	0.364184	3.46e-14	C	+	15	86010345	RP11-158M2.5	1
15:86010345:A:C	GTEx/v8	Skin_Sun_Exposed_Lower_leg	ENSG00000259762	C	0.000141333	0.35376	4.87e-11	C	+	15	86010345	RP11-158M2.4	1
5:172195092:A:G	GTEx/v8	Spleen	ENSG00000253736	A	4.64e-06	-0.485839	0.00457014	A	-	5	172195092	RP11-779O18.3	1
5:172196997:C:T	GTEx/v8	Spleen	ENSG00000253736	C	2.43e-06	-0.501758	0.00457014	C	-	5	172196997	RP11-779O18.3	1
5:172199366:A:G	GTEx/v8	Spleen	ENSG00000253736	A	1.84e-05	-0.470772	0.00457014	A	-	5	172199366	RP11-779O18.3	1
5:172199623:A:G	GTEx/v8	Spleen	ENSG00000253736	A	2.91e-06	-0.501962	0.00457014	A	-	5	172199623	RP11-779O18.3	1
5:172199964:T:TTA	GTEx/v8	Spleen	ENSG00000253736	T	2.65e-06	-0.529039	0.00457014	NA	NA	5	172199964	RP11-779O18.3	1
5:172200059:T:TG	GTEx/v8	Spleen	ENSG00000253736	TG	2.21e-06	-0.527879	0.00457014	NA	NA	5	172200059	RP11-779O18.3	1
5:172201901:C:T	GTEx/v8	Spleen	ENSG00000253736	T	5.78e-06	-0.503982	0.00457014	T	-	5	172201901	RP11-779O18.3	1
5:172203148:C:G	GTEx/v8	Spleen	ENSG00000253736	C	5.78e-06	-0.503982	0.00457014	C	-	5	172203148	RP11-779O18.3	1
5:172203886:C:G	GTEx/v8	Spleen	ENSG00000253736	C	3.97e-06	-0.514819	0.00457014	C	-	5	172203886	RP11-779O18.3	1
5:172203892:C:G	GTEx/v8	Spleen	ENSG00000253736	G	3.97e-06	-0.514819	0.00457014	G	-	5	172203892	RP11-779O18.3	1
5:172204629:C:T	GTEx/v8	Spleen	ENSG00000253736	T	1.3e-05	-0.487371	0.00457014	T	-	5	172204629	RP11-779O18.3	1
5:172206412:A:G	GTEx/v8	Spleen	ENSG00000253736	A	1.3e-05	-0.487371	0.00457014	A	-	5	172206412	RP11-779O18.3	1
5:172209023:A:G	GTEx/v8	Spleen	ENSG00000253736	A	1.45e-05	-0.46964	0.00457014	A	-	5	172209023	RP11-779O18.3	1
1:168944014:A:C	GTEx/v8	Testis	ENSG00000213063	A	7.25e-05	0.161433	5.83e-30	A	+	1	168944014	RPL29P7	1
5:172195092:A:G	GTEx/v8	Testis	ENSG00000253736	A	9.31e-06	-0.24508	0.0177878	A	-	5	172195092	RP11-779O18.3	1
5:172196997:C:T	GTEx/v8	Testis	ENSG00000253736	C	1.9e-05	-0.238362	0.0177878	C	-	5	172196997	RP11-779O18.3	1
5:172199366:A:G	GTEx/v8	Testis	ENSG00000253736	A	9.34e-05	-0.223837	0.0177878	A	-	5	172199366	RP11-779O18.3	1
5:172199964:T:TTA	GTEx/v8	Testis	ENSG00000253736	T	5.55e-05	-0.236789	0.0177878	NA	NA	5	172199964	RP11-779O18.3	1
5:172200059:T:TG	GTEx/v8	Testis	ENSG00000253736	TG	8.79e-05	-0.22972	0.0177878	NA	NA	5	172200059	RP11-779O18.3	1
5:172201901:C:T	GTEx/v8	Testis	ENSG00000253736	T	2.09e-05	-0.237655	0.0177878	T	-	5	172201901	RP11-779O18.3	1
5:172203148:C:G	GTEx/v8	Testis	ENSG00000253736	C	2.09e-05	-0.237655	0.0177878	C	-	5	172203148	RP11-779O18.3	1
5:172203886:C:G	GTEx/v8	Testis	ENSG00000253736	C	1.81e-05	-0.240383	0.0177878	C	-	5	172203886	RP11-779O18.3	1
5:172203892:C:G	GTEx/v8	Testis	ENSG00000253736	G	1.81e-05	-0.240383	0.0177878	G	-	5	172203892	RP11-779O18.3	1
5:172204629:C:T	GTEx/v8	Testis	ENSG00000253736	T	1.34e-05	-0.242936	0.0177878	T	-	5	172204629	RP11-779O18.3	1
5:172206412:A:G	GTEx/v8	Testis	ENSG00000253736	A	1.34e-05	-0.242936	0.0177878	A	-	5	172206412	RP11-779O18.3	1
5:172209023:A:G	GTEx/v8	Testis	ENSG00000253736	A	9.51e-05	-0.206186	0.0177878	A	-	5	172209023	RP11-779O18.3	1
5:172213922:A:G	GTEx/v8	Testis	ENSG00000253736	G	6.51e-05	-0.226737	0.0177878	G	-	5	172213922	RP11-779O18.3	1
15:86003010:A:G	GTEx/v8	Testis	ENSG00000259276	A	4.11e-06	-0.472619	5.78e-81	A	-	15	86003010	RP11-815J21.3	1
15:86003010:A:G	GTEx/v8	Testis	ENSG00000259416	A	2.72e-06	0.468557	1.83e-36	A	+	15	86003010	RP11-158M2.5	1
15:86004340:A:AATTTT	GTEx/v8	Testis	ENSG00000259276	AATTTT	0.000102937	-0.362741	5.78e-81	NA	NA	15	86004340	RP11-815J21.3	1
15:86004340:A:AATTTT	GTEx/v8	Testis	ENSG00000259416	AATTTT	1.5e-05	0.392454	1.83e-36	NA	NA	15	86004340	RP11-158M2.5	1
15:86010345:A:C	GTEx/v8	Testis	ENSG00000259276	C	3.74e-05	-0.495934	5.78e-81	C	-	15	86010345	RP11-815J21.3	1
1:235389777:A:G	GTEx/v8	Thyroid	ENSG00000162885	A	0.000121661	-0.558052	3.65e-25	NA	NA	1	235389777	B3GALNT2	1
1:235409403:C:G	GTEx/v8	Thyroid	ENSG00000162885	C	5.96e-05	-0.498689	3.65e-25	G	+	1	235409403	B3GALNT2	1
1:235433577:A:G	GTEx/v8	Thyroid	ENSG00000162885	A	5.96e-05	-0.498689	3.65e-25	G	+	1	235433577	B3GALNT2	1
1:235439317:C:T	GTEx/v8	Thyroid	ENSG00000162885	C	5.96e-05	-0.498689	3.65e-25	T	+	1	235439317	B3GALNT2	1
1:235460820:C:T	GTEx/v8	Thyroid	ENSG00000162885	T	5.96e-05	-0.498689	3.65e-25	C	+	1	235460820	B3GALNT2	1
1:235461945:C:T	GTEx/v8	Thyroid	ENSG00000162885	T	5.96e-05	-0.498689	3.65e-25	C	+	1	235461945	B3GALNT2	1
1:235466742:C:T	GTEx/v8	Thyroid	ENSG00000162885	T	5.96e-05	-0.498689	3.65e-25	C	+	1	235466742	B3GALNT2	1
5:55766621:C:G	GTEx/v8	Thyroid	ENSG00000248727	G	0.000193803	0.294378	0.0172817	G	+	5	55766621	CTC-236F12.4	1
9:114591558:A:G	GTEx/v8	Thyroid	ENSG00000242616	A	0.00012897	0.516872	4.3e-59	A	+	9	114591558	GNG10	1

## Sheet: AppendixA-ST9_partitionedherita
Category	Proportion of SNPs	Proportion of SNP-h2	Prop. of SNP-h2 Standard Error	Enrichment	Enrichment Standard Error	Enrichment P-value	Coefficient	Coefficient Standard Error	Coefficient Z-score	qFDR
astrocyte_enhancers	0.0220021	-0.0737512	0.0889068	-3.35201	4.04083	0.224291	-6.04e-08	5.23e-08	-1.15377	0.299055
astrocyte_promoters	0.00949027	0.413503	0.217902	43.5712	22.9605	0.00204479	5.75e-07	2.32e-07	2.4793	0.00721932
microglia_enhancers	0.0204296	-0.0182596	0.0777336	-0.89378	3.80495	0.60464	2.27e-10	5.36e-08	0.00423265	0.691017
microglia_promoters	0.00901134	0.312275	0.189672	34.6536	21.0482	0.023976	3.5e-07	2.55e-07	1.36872	0.0466851
neuronal_enhancers	0.0432359	0.335367	0.177884	7.75668	4.11427	0.0291782	1.23e-07	4.63e-08	2.64648	0.0466851
neuronal_promoters	0.0102539	0.391357	0.205563	38.1667	20.0473	0.00270725	4.7e-07	2.1e-07	2.24091	0.00721932
oligo_enhancers	0.025929	0.0408692	0.0868739	1.5762	3.35045	0.864281	1.6e-08	5.16e-08	0.310697	0.864281
oligo_promoters	0.00995612	0.411136	0.218391	41.2948	21.9353	0.00217855	5.33e-07	2.16e-07	2.46486	0.00721932

## Sheet: AppendixA-ST10_LOO_results
exposure	outcome	method	threshold	SNP	b	se	p
ME	beat-synch	INVW	5e-06	rs10044788	0.0894671	0.0509979	0.0793743
ME	beat-synch	INVW	5e-06	rs114029967	0.126994	0.0473651	0.00733627
ME	beat-synch	INVW	5e-06	rs12729624	0.100261	0.0532324	0.0596376
ME	beat-synch	INVW	5e-06	rs16885512	0.118634	0.0508971	0.0197609
ME	beat-synch	INVW	5e-06	rs3805476	0.0913384	0.0521495	0.0798643
ME	beat-synch	INVW	5e-06	rs6124907	0.0970857	0.0529364	0.0666533
ME	beat-synch	INVW	5e-06	rs7554669	0.0775587	0.047393	0.101735
ME	beat-synch	INVW	5e-06	rs79292477	0.100899	0.053654	0.0600339
ME	beat-synch	INVW	5e-06	rs80055245	0.103761	0.0533625	0.051841
ME	beat-synch	INVW	5e-06	rs9647401	0.133856	0.04401	0.00235401
ME	beat-synch	INVW	5e-06	All	0.104031	0.0480577	0.0304103
ME	beat-synch	MR-egger	5e-06	rs10044788	-0.0282796	0.156227	0.861485
ME	beat-synch	MR-egger	5e-06	rs114029967	0.166823	0.171847	0.364005
ME	beat-synch	MR-egger	5e-06	rs12729624	0.0354663	0.161803	0.832753
ME	beat-synch	MR-egger	5e-06	rs16885512	0.056159	0.152305	0.72323
ME	beat-synch	MR-egger	5e-06	rs3805476	0.0351196	0.153002	0.825015
ME	beat-synch	MR-egger	5e-06	rs6124907	0.0457633	0.171203	0.796939
ME	beat-synch	MR-egger	5e-06	rs7554669	0.0394962	0.13851	0.783782
ME	beat-synch	MR-egger	5e-06	rs79292477	0.0148447	0.166937	0.931633
ME	beat-synch	MR-egger	5e-06	rs80055245	0.0163083	0.175454	0.928548
ME	beat-synch	MR-egger	5e-06	rs9647401	-0.0234171	0.124395	0.856023
ME	beat-synch	MR-egger	5e-06	All	0.0332207	0.14722	0.82713
ME	beat-synch	INVW	5e-05	rs10044788	0.0373155	0.0183393	0.0418779
ME	beat-synch	INVW	5e-05	rs10145529	0.0392424	0.0184447	0.033373
ME	beat-synch	INVW	5e-05	rs10518914	0.0417645	0.0183609	0.0229271
ME	beat-synch	INVW	5e-05	rs11182656	0.0422416	0.0182616	0.0207153
ME	beat-synch	INVW	5e-05	rs111850655	0.0413195	0.0183711	0.0245023
ME	beat-synch	INVW	5e-05	rs112279425	0.0396104	0.0184306	0.0316212
ME	beat-synch	INVW	5e-05	rs113114385	0.041262	0.0183897	0.0248482
ME	beat-synch	INVW	5e-05	rs114029967	0.0417346	0.0184127	0.0234139
ME	beat-synch	INVW	5e-05	rs114671798	0.038376	0.0184001	0.0370108
ME	beat-synch	INVW	5e-05	rs114728400	0.0397924	0.0184298	0.0308397
ME	beat-synch	INVW	5e-05	rs114889645	0.0401382	0.0184313	0.0294266
ME	beat-synch	INVW	5e-05	rs115067899	0.0404793	0.0184403	0.0281525
ME	beat-synch	INVW	5e-05	rs11516158	0.0436401	0.018089	0.0158426
ME	beat-synch	INVW	5e-05	rs115618389	0.0400105	0.0184597	0.0302004
ME	beat-synch	INVW	5e-05	rs11599214	0.0381224	0.0183528	0.0377829
ME	beat-synch	INVW	5e-05	rs116272295	0.0395193	0.0184297	0.0320072
ME	beat-synch	INVW	5e-05	rs116357459	0.0388391	0.0184104	0.0348908
ME	beat-synch	INVW	5e-05	rs116481454	0.039774	0.0184641	0.0312307
ME	beat-synch	INVW	5e-05	rs116836168	0.0392071	0.0184196	0.0332914
ME	beat-synch	INVW	5e-05	rs117350699	0.0435295	0.0180379	0.0158118
ME	beat-synch	INVW	5e-05	rs117467003	0.040949	0.0184	0.0260486
ME	beat-synch	INVW	5e-05	rs117693140	0.0381094	0.018303	0.0373304
ME	beat-synch	INVW	5e-05	rs118116932	0.0411474	0.0183853	0.0252168
ME	beat-synch	INVW	5e-05	rs11819822	0.0400454	0.0184411	0.0298913
ME	beat-synch	INVW	5e-05	rs12344168	0.0415738	0.0183675	0.0236086
ME	beat-synch	INVW	5e-05	rs12498129	0.0398844	0.0184419	0.0305636
ME	beat-synch	INVW	5e-05	rs12691510	0.0428204	0.0181879	0.0185559
ME	beat-synch	INVW	5e-05	rs12729624	0.0386602	0.0184336	0.0359699
ME	beat-synch	INVW	5e-05	rs12830744	0.0424345	0.0182526	0.0200803
ME	beat-synch	INVW	5e-05	rs138653681	0.0371696	0.0182376	0.0415424
ME	beat-synch	INVW	5e-05	rs139385746	0.0390524	0.0184343	0.0341354
ME	beat-synch	INVW	5e-05	rs139634777	0.0410246	0.0184219	0.0259509
ME	beat-synch	INVW	5e-05	rs140373307	0.040072	0.0184585	0.0299372
ME	beat-synch	INVW	5e-05	rs141892738	0.0398437	0.0184312	0.0306372
ME	beat-synch	INVW	5e-05	rs143473687	0.0387193	0.0183904	0.035256
ME	beat-synch	INVW	5e-05	rs146845996	0.0389373	0.0183896	0.0342291
ME	beat-synch	INVW	5e-05	rs146880209	0.0381833	0.0183521	0.0374711
ME	beat-synch	INVW	5e-05	rs146931802	0.0365206	0.0181262	0.0439262
ME	beat-synch	INVW	5e-05	rs147956836	0.043246	0.0181579	0.0172347
ME	beat-synch	INVW	5e-05	rs150942220	0.0406741	0.0184141	0.0271844
ME	beat-synch	INVW	5e-05	rs1529404	0.04106	0.0183981	0.0256315
ME	beat-synch	INVW	5e-05	rs16833234	0.0381919	0.0183656	0.0375681
ME	beat-synch	INVW	5e-05	rs16885512	0.04081	0.0184545	0.0270093
ME	beat-synch	INVW	5e-05	rs17366088	0.0409754	0.0184104	0.0260367
ME	beat-synch	INVW	5e-05	rs2139783	0.0399919	0.01845	0.0301909
ME	beat-synch	INVW	5e-05	rs2765233	0.0417165	0.0183667	0.0231285
ME	beat-synch	INVW	5e-05	rs2879134	0.0371875	0.0182538	0.0416249
ME	beat-synch	INVW	5e-05	rs2920674	0.0402848	0.0184386	0.0289028
ME	beat-synch	INVW	5e-05	rs294781	0.0398282	0.018445	0.0308271
ME	beat-synch	INVW	5e-05	rs35448821	0.0379604	0.0183356	0.0384236
ME	beat-synch	INVW	5e-05	rs35509495	0.0376298	0.0183187	0.0399587
ME	beat-synch	INVW	5e-05	rs361742	0.0428131	0.0182023	0.0186694
ME	beat-synch	INVW	5e-05	rs3740563	0.0415017	0.0183676	0.0238517
ME	beat-synch	INVW	5e-05	rs3805476	0.0374664	0.0183789	0.0414941
ME	beat-synch	INVW	5e-05	rs3898946	0.0408469	0.0184218	0.0266017
ME	beat-synch	INVW	5e-05	rs41873	0.0405691	0.018423	0.0276593
ME	beat-synch	INVW	5e-05	rs4263139	0.0387635	0.0184192	0.0353331
ME	beat-synch	INVW	5e-05	rs4312581	0.0392679	0.0184331	0.0331473
ME	beat-synch	INVW	5e-05	rs4493636	0.0369636	0.0182277	0.0425725
ME	beat-synch	INVW	5e-05	rs4572341	0.044223	0.0180065	0.0140514
ME	beat-synch	INVW	5e-05	rs4632421	0.0398297	0.0184402	0.0307778
ME	beat-synch	INVW	5e-05	rs4722155	0.0419342	0.0183102	0.0220087
ME	beat-synch	INVW	5e-05	rs4940732	0.0404402	0.0184332	0.0282442
ME	beat-synch	INVW	5e-05	rs4945445	0.0390689	0.0184219	0.0339405
ME	beat-synch	INVW	5e-05	rs539674	0.0400734	0.0184494	0.0298504
ME	beat-synch	INVW	5e-05	rs55701468	0.0402234	0.0184513	0.0292594
ME	beat-synch	INVW	5e-05	rs55958146	0.040607	0.0184271	0.0275487
ME	beat-synch	INVW	5e-05	rs573520075	0.0405707	0.018286	0.0265089
ME	beat-synch	INVW	5e-05	rs57482675	0.0380688	0.0183653	0.0381844
ME	beat-synch	INVW	5e-05	rs59187081	0.0378533	0.018338	0.0389986
ME	beat-synch	INVW	5e-05	rs6124907	0.0382464	0.0184151	0.0378101
ME	beat-synch	INVW	5e-05	rs61647450	0.0388441	0.0184169	0.0349318
ME	beat-synch	INVW	5e-05	rs61774392	0.0388867	0.0183944	0.034511
ME	beat-synch	INVW	5e-05	rs62514000	0.0409014	0.0182903	0.025336
ME	beat-synch	INVW	5e-05	rs62520433	0.0368949	0.0181799	0.0424136
ME	beat-synch	INVW	5e-05	rs6591217	0.0384948	0.0183874	0.0363002
ME	beat-synch	INVW	5e-05	rs6672634	0.0384952	0.0184049	0.0364771
ME	beat-synch	INVW	5e-05	rs6727937	0.0394613	0.0184378	0.0323357
ME	beat-synch	INVW	5e-05	rs6739228	0.0423415	0.018296	0.0206538
ME	beat-synch	INVW	5e-05	rs6807224	0.0393467	0.018449	0.032947
ME	beat-synch	INVW	5e-05	rs6901468	0.0405552	0.0184323	0.0277907
ME	beat-synch	INVW	5e-05	rs6904638	0.0394714	0.0184546	0.0324488
ME	beat-synch	INVW	5e-05	rs7093729	0.0369663	0.0182131	0.0423922
ME	beat-synch	INVW	5e-05	rs7135991	0.0396059	0.0184383	0.0317118
ME	beat-synch	INVW	5e-05	rs714324	0.0399998	0.0184262	0.0299454
ME	beat-synch	INVW	5e-05	rs72784378	0.0385314	0.0183659	0.0359062
ME	beat-synch	INVW	5e-05	rs7322542	0.0383653	0.0183967	0.0370284
ME	beat-synch	INVW	5e-05	rs73380329	0.0408833	0.0184112	0.0263802
ME	beat-synch	INVW	5e-05	rs734082	0.0382	0.0183609	0.0374786
ME	beat-synch	INVW	5e-05	rs74155841	0.0405751	0.0184446	0.0278182
ME	beat-synch	INVW	5e-05	rs74379781	0.0432386	0.0181244	0.0170485
ME	beat-synch	INVW	5e-05	rs75507123	0.0393153	0.0184387	0.0329886
ME	beat-synch	INVW	5e-05	rs7554669	0.035751	0.0182287	0.0498497
ME	beat-synch	INVW	5e-05	rs76068018	0.0402843	0.0184305	0.0288346
ME	beat-synch	INVW	5e-05	rs76195952	0.0411595	0.0183805	0.0251363
ME	beat-synch	INVW	5e-05	rs77386957	0.0381608	0.0183544	0.037607
ME	beat-synch	INVW	5e-05	rs77733833	0.044174	0.0178776	0.0134769
ME	beat-synch	INVW	5e-05	rs78934210	0.0413003	0.0184004	0.0247982
ME	beat-synch	INVW	5e-05	rs79292477	0.0386402	0.0184508	0.0362395
ME	beat-synch	INVW	5e-05	rs799455	0.0429918	0.0181538	0.0178747
ME	beat-synch	INVW	5e-05	rs80055245	0.0390966	0.0184504	0.0340894
ME	beat-synch	INVW	5e-05	rs80071083	0.0384702	0.0183618	0.0361605
ME	beat-synch	INVW	5e-05	rs8191416	0.0385656	0.0183787	0.0358716
ME	beat-synch	INVW	5e-05	rs9520594	0.0359922	0.0179807	0.045315
ME	beat-synch	INVW	5e-05	rs9647401	0.0424983	0.0183556	0.0205977
ME	beat-synch	INVW	5e-05	rs9824424	0.0397954	0.0184292	0.0308215
ME	beat-synch	INVW	5e-05	All	0.0398702	0.0182707	0.0290949
ME	beat-synch	MR-egger	5e-05	rs10044788	0.0433535	0.045243	0.340188
ME	beat-synch	MR-egger	5e-05	rs10145529	0.0520068	0.0452421	0.253003
ME	beat-synch	MR-egger	5e-05	rs10518914	0.048606	0.0449871	0.282468
ME	beat-synch	MR-egger	5e-05	rs11182656	0.044548	0.044963	0.324119
ME	beat-synch	MR-egger	5e-05	rs111850655	0.0561366	0.0453797	0.218884
ME	beat-synch	MR-egger	5e-05	rs112279425	0.0507793	0.0451433	0.263268
ME	beat-synch	MR-egger	5e-05	rs113114385	0.0563215	0.0455075	0.218667
ME	beat-synch	MR-egger	5e-05	rs114029967	0.058907	0.0458021	0.201285
ME	beat-synch	MR-egger	5e-05	rs114671798	0.0465609	0.0453543	0.307012
ME	beat-synch	MR-egger	5e-05	rs114728400	0.0507516	0.045152	0.263618
ME	beat-synch	MR-egger	5e-05	rs114889645	0.0518491	0.0455014	0.257136
ME	beat-synch	MR-egger	5e-05	rs115067899	0.0532318	0.0456203	0.245967
ME	beat-synch	MR-egger	5e-05	rs11516158	0.0496411	0.044272	0.264779
ME	beat-synch	MR-egger	5e-05	rs115618389	0.0515565	0.0457271	0.262158
ME	beat-synch	MR-egger	5e-05	rs11599214	0.0512713	0.0449277	0.256435
ME	beat-synch	MR-egger	5e-05	rs116272295	0.0496119	0.0456053	0.2792
ME	beat-synch	MR-egger	5e-05	rs116357459	0.0466036	0.0457014	0.310241
ME	beat-synch	MR-egger	5e-05	rs116481454	0.0506348	0.0454237	0.267564
ME	beat-synch	MR-egger	5e-05	rs116836168	0.048738	0.0454484	0.286055
ME	beat-synch	MR-egger	5e-05	rs117350699	0.0631082	0.044488	0.159051
ME	beat-synch	MR-egger	5e-05	rs117467003	0.0551726	0.0455228	0.228294
ME	beat-synch	MR-egger	5e-05	rs117693140	0.0442454	0.0452373	0.330329
ME	beat-synch	MR-egger	5e-05	rs118116932	0.0543752	0.0452563	0.232315
ME	beat-synch	MR-egger	5e-05	rs11819822	0.0510825	0.0452359	0.261416
ME	beat-synch	MR-egger	5e-05	rs12344168	0.0467656	0.0451813	0.303063
ME	beat-synch	MR-egger	5e-05	rs12498129	0.0508199	0.0452036	0.263522
ME	beat-synch	MR-egger	5e-05	rs12691510	0.0454293	0.0446563	0.31139
ME	beat-synch	MR-egger	5e-05	rs12729624	0.0510618	0.0450671	0.259838
ME	beat-synch	MR-egger	5e-05	rs12830744	0.0442913	0.0449257	0.326502
ME	beat-synch	MR-egger	5e-05	rs138653681	0.0402453	0.0452005	0.375341
ME	beat-synch	MR-egger	5e-05	rs139385746	0.0488073	0.0453513	0.28435
ME	beat-synch	MR-egger	5e-05	rs139634777	0.0548491	0.0455027	0.230809
ME	beat-synch	MR-egger	5e-05	rs140373307	0.0516949	0.0456458	0.260045
ME	beat-synch	MR-egger	5e-05	rs141892738	0.0508754	0.0456079	0.267234
ME	beat-synch	MR-egger	5e-05	rs143473687	0.0463339	0.0455469	0.311404
ME	beat-synch	MR-egger	5e-05	rs146845996	0.0470621	0.0455315	0.303736
ME	beat-synch	MR-egger	5e-05	rs146880209	0.04553	0.045276	0.31696
ME	beat-synch	MR-egger	5e-05	rs146931802	0.0429815	0.0445711	0.337136
ME	beat-synch	MR-egger	5e-05	rs147956836	0.0651055	0.0450235	0.151203
ME	beat-synch	MR-egger	5e-05	rs150942220	0.0524253	0.0452218	0.249017
ME	beat-synch	MR-egger	5e-05	rs1529404	0.0483066	0.0452136	0.287834
ME	beat-synch	MR-egger	5e-05	rs16833234	0.0513287	0.0449528	0.256169
ME	beat-synch	MR-egger	5e-05	rs16885512	0.0526594	0.0452792	0.24752
ME	beat-synch	MR-egger	5e-05	rs17366088	0.0525276	0.0451504	0.247359
ME	beat-synch	MR-egger	5e-05	rs2139783	0.0511639	0.0453801	0.262171
ME	beat-synch	MR-egger	5e-05	rs2765233	0.0488235	0.0449919	0.280384
ME	beat-synch	MR-egger	5e-05	rs2879134	0.0541825	0.0447076	0.228312
ME	beat-synch	MR-egger	5e-05	rs2920674	0.0505794	0.0451488	0.265199
ME	beat-synch	MR-egger	5e-05	rs294781	0.0507576	0.0451561	0.263606
ME	beat-synch	MR-egger	5e-05	rs35448821	0.0440004	0.0453462	0.334159
ME	beat-synch	MR-egger	5e-05	rs35509495	0.0547048	0.0449123	0.225992
ME	beat-synch	MR-egger	5e-05	rs361742	0.0537127	0.0445902	0.231124
ME	beat-synch	MR-egger	5e-05	rs3740563	0.0521407	0.0449891	0.249151
ME	beat-synch	MR-egger	5e-05	rs3805476	0.0486161	0.0449265	0.281724
ME	beat-synch	MR-egger	5e-05	rs3898946	0.0489061	0.0452452	0.28226
ME	beat-synch	MR-egger	5e-05	rs41873	0.0489797	0.045382	0.282985
ME	beat-synch	MR-egger	5e-05	rs4263139	0.0509551	0.0450684	0.260843
ME	beat-synch	MR-egger	5e-05	rs4312581	0.0508032	0.0451225	0.262826
ME	beat-synch	MR-egger	5e-05	rs4493636	0.0577924	0.0447655	0.199593
ME	beat-synch	MR-egger	5e-05	rs4572341	0.0567868	0.0441113	0.200856
ME	beat-synch	MR-egger	5e-05	rs4632421	0.0507386	0.0452787	0.265071
ME	beat-synch	MR-egger	5e-05	rs4722155	0.0455564	0.0450677	0.31446
ME	beat-synch	MR-egger	5e-05	rs4940732	0.0494194	0.0453853	0.278746
ME	beat-synch	MR-egger	5e-05	rs4945445	0.0531463	0.0453354	0.243784
ME	beat-synch	MR-egger	5e-05	rs539674	0.0506127	0.0451906	0.265325
ME	beat-synch	MR-egger	5e-05	rs55701468	0.0514999	0.0452862	0.258089
ME	beat-synch	MR-egger	5e-05	rs55958146	0.0495702	0.0452243	0.275593
ME	beat-synch	MR-egger	5e-05	rs573520075	0.0532925	0.0450028	0.239057
ME	beat-synch	MR-egger	5e-05	rs57482675	0.0443243	0.0454587	0.331822
ME	beat-synch	MR-egger	5e-05	rs59187081	0.053967	0.0449477	0.232637
ME	beat-synch	MR-egger	5e-05	rs6124907	0.0524469	0.0450463	0.246997
ME	beat-synch	MR-egger	5e-05	rs61647450	0.0519638	0.0451152	0.252069
ME	beat-synch	MR-egger	5e-05	rs61774392	0.0471797	0.0454892	0.302089
ME	beat-synch	MR-egger	5e-05	rs62514000	0.0525396	0.0449455	0.245118
ME	beat-synch	MR-egger	5e-05	rs62520433	0.041479	0.0448552	0.357268
ME	beat-synch	MR-egger	5e-05	rs6591217	0.053824	0.0451517	0.235973
ME	beat-synch	MR-egger	5e-05	rs6672634	0.0499143	0.0450453	0.270404
ME	beat-synch	MR-egger	5e-05	rs6727937	0.0502749	0.0451924	0.268529
ME	beat-synch	MR-egger	5e-05	rs6739228	0.0498258	0.0447799	0.268435
ME	beat-synch	MR-egger	5e-05	rs6807224	0.049813	0.0452828	0.273878
ME	beat-synch	MR-egger	5e-05	rs6901468	0.0492424	0.0453427	0.280012
ME	beat-synch	MR-egger	5e-05	rs6904638	0.0508793	0.0451407	0.262308
ME	beat-synch	MR-egger	5e-05	rs7093729	0.0564881	0.0446745	0.208927
ME	beat-synch	MR-egger	5e-05	rs7135991	0.0515153	0.0453081	0.258177
ME	beat-synch	MR-egger	5e-05	rs714324	0.0506957	0.0451693	0.264324
ME	beat-synch	MR-egger	5e-05	rs72784378	0.0469494	0.0452469	0.301874
ME	beat-synch	MR-egger	5e-05	rs7322542	0.0485676	0.0450973	0.284018
ME	beat-synch	MR-egger	5e-05	rs73380329	0.0502092	0.0450918	0.26809
ME	beat-synch	MR-egger	5e-05	rs734082	0.0550915	0.045135	0.225027
ME	beat-synch	MR-egger	5e-05	rs74155841	0.0532523	0.045539	0.24495
ME	beat-synch	MR-egger	5e-05	rs74379781	0.0606356	0.04463	0.177232
ME	beat-synch	MR-egger	5e-05	rs75507123	0.0506209	0.0451307	0.264618
ME	beat-synch	MR-egger	5e-05	rs7554669	0.0472679	0.0445125	0.290764
ME	beat-synch	MR-egger	5e-05	rs76068018	0.0519395	0.0453501	0.254739
ME	beat-synch	MR-egger	5e-05	rs76195952	0.0549522	0.0453121	0.228
ME	beat-synch	MR-egger	5e-05	rs77386957	0.0475151	0.0450678	0.294211
ME	beat-synch	MR-egger	5e-05	rs77733833	0.0659597	0.044113	0.137908
ME	beat-synch	MR-egger	5e-05	rs78934210	0.0526519	0.0450857	0.245577
ME	beat-synch	MR-egger	5e-05	rs79292477	0.0474193	0.0454872	0.299632
ME	beat-synch	MR-egger	5e-05	rs799455	0.0439729	0.0446238	0.326731
ME	beat-synch	MR-egger	5e-05	rs80055245	0.0482303	0.0456711	0.293423
ME	beat-synch	MR-egger	5e-05	rs80071083	0.0468647	0.0452262	0.302522
ME	beat-synch	MR-egger	5e-05	rs8191416	0.0456439	0.0455339	0.318492
ME	beat-synch	MR-egger	5e-05	rs9520594	0.0621345	0.0442115	0.162914
ME	beat-synch	MR-egger	5e-05	rs9647401	0.0510144	0.0448365	0.257849
ME	beat-synch	MR-egger	5e-05	rs9824424	0.0506816	0.0452149	0.264935
ME	beat-synch	MR-egger	5e-05	All	0.0507812	0.0449318	0.260999
beat-synch	ME	INVW	5e-08	rs10168817	0.128537	0.0333848	0.00011803
beat-synch	ME	INVW	5e-08	rs10744255	0.141236	0.0333999	2.35116e-05
beat-synch	ME	INVW	5e-08	rs10779987	0.136727	0.0340088	5.81127e-05
beat-synch	ME	INVW	5e-08	rs10875125	0.133837	0.033916	7.94233e-05
beat-synch	ME	INVW	5e-08	rs10877461	0.143718	0.0329586	1.29739e-05
beat-synch	ME	INVW	5e-08	rs10885458	0.134217	0.0337094	6.8457e-05
beat-synch	ME	INVW	5e-08	rs10978661	0.13322	0.0336414	7.49464e-05
beat-synch	ME	INVW	5e-08	rs10984506	0.13069	0.0334952	9.55049e-05
beat-synch	ME	INVW	5e-08	rs11210206	0.136597	0.0338707	5.5093e-05
beat-synch	ME	INVW	5e-08	rs11692449	0.137244	0.033784	4.85732e-05
beat-synch	ME	INVW	5e-08	rs11996434	0.133967	0.033711	7.06761e-05
beat-synch	ME	INVW	5e-08	rs12056186	0.129121	0.0327474	8.04919e-05
beat-synch	ME	INVW	5e-08	rs12638746	0.132713	0.0335637	7.68343e-05
beat-synch	ME	INVW	5e-08	rs12909047	0.138634	0.0337334	3.96167e-05
beat-synch	ME	INVW	5e-08	rs12913592	0.137741	0.0338609	4.74482e-05
beat-synch	ME	INVW	5e-08	rs13163173	0.132192	0.0335411	8.10792e-05
beat-synch	ME	INVW	5e-08	rs13197257	0.139864	0.0335514	3.06408e-05
beat-synch	ME	INVW	5e-08	rs1349028	0.139043	0.0337529	3.79803e-05
beat-synch	ME	INVW	5e-08	rs1426371	0.133463	0.0338143	7.91562e-05
beat-synch	ME	INVW	5e-08	rs1468701	0.137307	0.03392	5.1664e-05
beat-synch	ME	INVW	5e-08	rs1596431	0.140506	0.0334777	2.70467e-05
beat-synch	ME	INVW	5e-08	rs1832909	0.142983	0.0334944	1.96463e-05
beat-synch	ME	INVW	5e-08	rs1901739	0.143531	0.0329453	1.32079e-05
beat-synch	ME	INVW	5e-08	rs191373913	0.133129	0.0336072	7.45349e-05
beat-synch	ME	INVW	5e-08	rs1996148	0.134751	0.0337467	6.52439e-05
beat-synch	ME	INVW	5e-08	rs2061843	0.13492	0.033809	6.58907e-05
beat-synch	ME	INVW	5e-08	rs2284901	0.135237	0.033807	6.32729e-05
beat-synch	ME	INVW	5e-08	rs2453873	0.135415	0.0338345	6.27343e-05
beat-synch	ME	INVW	5e-08	rs2505344	0.138754	0.0337252	3.88414e-05
beat-synch	ME	INVW	5e-08	rs2635634	0.135062	0.0338854	6.72397e-05
beat-synch	ME	INVW	5e-08	rs2819333	0.136049	0.033832	5.78725e-05
beat-synch	ME	INVW	5e-08	rs28392605	0.143011	0.0335185	1.98465e-05
beat-synch	ME	INVW	5e-08	rs3024293	0.142236	0.0332875	1.9289e-05
beat-synch	ME	INVW	5e-08	rs34762587	0.137084	0.0339584	5.41795e-05
beat-synch	ME	INVW	5e-08	rs4263335	0.132176	0.0334924	7.93256e-05
beat-synch	ME	INVW	5e-08	rs43182	0.132516	0.0335163	7.69239e-05
beat-synch	ME	INVW	5e-08	rs4443239	0.142969	0.0331017	1.56683e-05
beat-synch	ME	INVW	5e-08	rs4675682	0.134441	0.0337391	6.75636e-05
beat-synch	ME	INVW	5e-08	rs4704043	0.129709	0.0329268	8.17164e-05
beat-synch	ME	INVW	5e-08	rs476141	0.143002	0.0329039	1.38608e-05
beat-synch	ME	INVW	5e-08	rs4792891	0.141745	0.0336067	2.46744e-05
beat-synch	ME	INVW	5e-08	rs526904	0.140759	0.0334519	2.57854e-05
beat-synch	ME	INVW	5e-08	rs55678522	0.139571	0.0336748	3.40283e-05
beat-synch	ME	INVW	5e-08	rs6087848	0.141609	0.0333596	2.18659e-05
beat-synch	ME	INVW	5e-08	rs62014217	0.136459	0.0337875	5.37396e-05
beat-synch	ME	INVW	5e-08	rs62340585	0.134305	0.0339827	7.74534e-05
beat-synch	ME	INVW	5e-08	rs6548147	0.135182	0.0337866	6.30612e-05
beat-synch	ME	INVW	5e-08	rs6572878	0.137712	0.0338333	4.69496e-05
beat-synch	ME	INVW	5e-08	rs67264739	0.13936	0.0336685	3.48561e-05
beat-synch	ME	INVW	5e-08	rs67816799	0.132506	0.0335457	7.81486e-05
beat-synch	ME	INVW	5e-08	rs72700870	0.139566	0.0337439	3.53376e-05
beat-synch	ME	INVW	5e-08	rs7501911	0.136415	0.0338507	5.57966e-05
beat-synch	ME	INVW	5e-08	rs7586405	0.140122	0.0336216	3.07808e-05
beat-synch	ME	INVW	5e-08	rs764299	0.129358	0.0332509	0.0001001
beat-synch	ME	INVW	5e-08	rs7856850	0.136543	0.0338022	5.35754e-05
beat-synch	ME	INVW	5e-08	rs7939759	0.133368	0.0336586	7.42117e-05
beat-synch	ME	INVW	5e-08	rs8079923	0.14333	0.0329202	1.33763e-05
beat-synch	ME	INVW	5e-08	rs848293	0.122668	0.0325482	0.000164023
beat-synch	ME	INVW	5e-08	rs9400241	0.131541	0.0337007	9.49209e-05
beat-synch	ME	INVW	5e-08	rs9626920	0.131939	0.0336959	9.01833e-05
beat-synch	ME	INVW	5e-08	rs9710427	0.135703	0.0338074	5.97e-05
beat-synch	ME	INVW	5e-08	All	0.136353	0.0333035	4.2351e-05
beat-synch	ME	MR-egger	5e-08	rs10168817	0.272069	0.232192	0.246093
beat-synch	ME	MR-egger	5e-08	rs10744255	0.315707	0.231277	0.177505
beat-synch	ME	MR-egger	5e-08	rs10779987	0.319456	0.2367	0.18238
beat-synch	ME	MR-egger	5e-08	rs10875125	0.292519	0.250984	0.248592
beat-synch	ME	MR-egger	5e-08	rs10877461	0.301391	0.228353	0.192072
beat-synch	ME	MR-egger	5e-08	rs10885458	0.326492	0.234222	0.168653
beat-synch	ME	MR-egger	5e-08	rs10978661	0.282631	0.238067	0.239993
beat-synch	ME	MR-egger	5e-08	rs10984506	0.303273	0.231515	0.195377
beat-synch	ME	MR-egger	5e-08	rs11210206	0.313975	0.234252	0.185366
beat-synch	ME	MR-egger	5e-08	rs11692449	0.309924	0.237114	0.196348
beat-synch	ME	MR-egger	5e-08	rs11996434	0.323562	0.233773	0.171635
beat-synch	ME	MR-egger	5e-08	rs12056186	0.399033	0.228751	0.0863871
beat-synch	ME	MR-egger	5e-08	rs12638746	0.33889	0.233334	0.151784
beat-synch	ME	MR-egger	5e-08	rs12909047	0.298426	0.236295	0.211664
beat-synch	ME	MR-egger	5e-08	rs12913592	0.313785	0.234032	0.185221
beat-synch	ME	MR-egger	5e-08	rs13163173	0.28732	0.23412	0.224692
beat-synch	ME	MR-egger	5e-08	rs13197257	0.299174	0.233319	0.204856
beat-synch	ME	MR-egger	5e-08	rs1349028	0.319298	0.233561	0.176874
beat-synch	ME	MR-egger	5e-08	rs1426371	0.297675	0.235633	0.211536
beat-synch	ME	MR-egger	5e-08	rs1468701	0.320099	0.235342	0.179048
beat-synch	ME	MR-egger	5e-08	rs1596431	0.331367	0.232249	0.159005
beat-synch	ME	MR-egger	5e-08	rs1832909	0.344843	0.23163	0.141966
beat-synch	ME	MR-egger	5e-08	rs1901739	0.271336	0.229931	0.242788
beat-synch	ME	MR-egger	5e-08	rs191373913	0.353844	0.235651	0.138636
beat-synch	ME	MR-egger	5e-08	rs1996148	0.328342	0.235266	0.168149
beat-synch	ME	MR-egger	5e-08	rs2061843	0.322577	0.234759	0.174705
beat-synch	ME	MR-egger	5e-08	rs2284901	0.323794	0.235432	0.174321
beat-synch	ME	MR-egger	5e-08	rs2453873	0.312036	0.234247	0.188044
beat-synch	ME	MR-egger	5e-08	rs2505344	0.32453	0.234004	0.170791
beat-synch	ME	MR-egger	5e-08	rs2635634	0.313749	0.234032	0.185271
beat-synch	ME	MR-egger	5e-08	rs2819333	0.317913	0.235459	0.182203
beat-synch	ME	MR-egger	5e-08	rs28392605	0.361274	0.232849	0.126213
beat-synch	ME	MR-egger	5e-08	rs3024293	0.329943	0.230416	0.157526
beat-synch	ME	MR-egger	5e-08	rs34762587	0.321596	0.236441	0.179045
beat-synch	ME	MR-egger	5e-08	rs4263335	0.355645	0.233851	0.133739
beat-synch	ME	MR-egger	5e-08	rs43182	0.282305	0.235103	0.234721
beat-synch	ME	MR-egger	5e-08	rs4443239	0.317443	0.229095	0.171163
beat-synch	ME	MR-egger	5e-08	rs4675682	0.338913	0.236635	0.157449
beat-synch	ME	MR-egger	5e-08	rs4704043	0.354181	0.22838	0.12638
beat-synch	ME	MR-egger	5e-08	rs476141	0.237932	0.233327	0.312087
beat-synch	ME	MR-egger	5e-08	rs4792891	0.339393	0.232608	0.149939
beat-synch	ME	MR-egger	5e-08	rs526904	0.283204	0.234002	0.231086
beat-synch	ME	MR-egger	5e-08	rs55678522	0.32436	0.2333	0.169746
beat-synch	ME	MR-egger	5e-08	rs6087848	0.2799	0.233084	0.23469
beat-synch	ME	MR-egger	5e-08	rs62014217	0.313672	0.234205	0.185696
beat-synch	ME	MR-egger	5e-08	rs62340585	0.301736	0.247089	0.226965
beat-synch	ME	MR-egger	5e-08	rs6548147	0.331923	0.237263	0.167148
beat-synch	ME	MR-egger	5e-08	rs6572878	0.310515	0.234387	0.190435
beat-synch	ME	MR-egger	5e-08	rs67264739	0.308598	0.233311	0.191132
beat-synch	ME	MR-egger	5e-08	rs67816799	0.349855	0.234005	0.140316
beat-synch	ME	MR-egger	5e-08	rs72700870	0.364805	0.239358	0.132918
beat-synch	ME	MR-egger	5e-08	rs7501911	0.316218	0.235811	0.185155
beat-synch	ME	MR-egger	5e-08	rs7586405	0.308667	0.232796	0.190067
beat-synch	ME	MR-egger	5e-08	rs764299	0.281576	0.230994	0.227788
beat-synch	ME	MR-egger	5e-08	rs7856850	0.313591	0.234237	0.185866
beat-synch	ME	MR-egger	5e-08	rs7939759	0.316042	0.233022	0.180269
beat-synch	ME	MR-egger	5e-08	rs8079923	0.314987	0.227999	0.172415
beat-synch	ME	MR-egger	5e-08	rs848293	0.17479	0.232761	0.455724
beat-synch	ME	MR-egger	5e-08	rs9400241	0.283649	0.235298	0.232911
beat-synch	ME	MR-egger	5e-08	rs9626920	0.305434	0.232777	0.194646
beat-synch	ME	MR-egger	5e-08	rs9710427	0.323992	0.236614	0.17619
beat-synch	ME	MR-egger	5e-08	All	0.313684	0.232211	0.181899
ME	language	INVW	5e-06	rs10044788	0.0526093	0.0596774	0.378014
ME	language	INVW	5e-06	rs114029967	0.0499762	0.0597101	0.402603
ME	language	INVW	5e-06	rs117450000	0.0617899	0.0553526	0.264295
ME	language	INVW	5e-06	rs12729624	0.00168234	0.0522594	0.974319
ME	language	INVW	5e-06	rs3805476	0.0480339	0.0605965	0.427961
ME	language	INVW	5e-06	rs6124907	0.0323827	0.057319	0.572104
ME	language	INVW	5e-06	rs7554669	0.048478	0.0610019	0.426791
ME	language	INVW	5e-06	rs80055245	0.0512544	0.0598847	0.392062
ME	language	INVW	5e-06	rs9647401	0.0666035	0.054987	0.225796
ME	language	INVW	5e-06	All	0.0458707	0.0529622	0.386433
ME	language	INVW	5e-05	rs10044788	0.045116	0.0202618	0.0259704
ME	language	INVW	5e-05	rs10518914	0.0472049	0.0200184	0.0183698
ME	language	INVW	5e-05	rs11182656	0.042088	0.020091	0.0361827
ME	language	INVW	5e-05	rs111850655	0.041325	0.0199455	0.0382751
ME	language	INVW	5e-05	rs112279425	0.0428775	0.0201697	0.0335169
ME	language	INVW	5e-05	rs113114385	0.0428811	0.0201899	0.0336793
ME	language	INVW	5e-05	rs114029967	0.0447997	0.0202587	0.0270096
ME	language	INVW	5e-05	rs114671798	0.0443662	0.0202483	0.0284437
ME	language	INVW	5e-05	rs114728400	0.0426693	0.0201447	0.0341627
ME	language	INVW	5e-05	rs115067899	0.0450445	0.0202207	0.0259043
ME	language	INVW	5e-05	rs115618389	0.0460244	0.0201808	0.0225723
ME	language	INVW	5e-05	rs11599214	0.0435162	0.020213	0.0313278
ME	language	INVW	5e-05	rs116272295	0.0471441	0.0200022	0.0184261
ME	language	INVW	5e-05	rs116836168	0.0396421	0.0195928	0.0430419
ME	language	INVW	5e-05	rs117350699	0.0464621	0.0200918	0.0207506
ME	language	INVW	5e-05	rs117450000	0.046303	0.0201287	0.0214283
ME	language	INVW	5e-05	rs117467003	0.045978	0.0201177	0.0222865
ME	language	INVW	5e-05	rs117693140	0.0420234	0.0200315	0.035917
ME	language	INVW	5e-05	rs118116932	0.0475927	0.0199257	0.0169166
ME	language	INVW	5e-05	rs11819822	0.0456814	0.0201792	0.0235874
ME	language	INVW	5e-05	rs12498129	0.0416149	0.0200313	0.0377561
ME	language	INVW	5e-05	rs12691510	0.0428075	0.0201664	0.0337774
ME	language	INVW	5e-05	rs12729624	0.0388593	0.019655	0.0480339
ME	language	INVW	5e-05	rs12830744	0.0417555	0.0200561	0.0373485
ME	language	INVW	5e-05	rs138653681	0.0460378	0.0201019	0.0220085
ME	language	INVW	5e-05	rs139634777	0.0422114	0.0201453	0.0361404
ME	language	INVW	5e-05	rs140373307	0.0466155	0.0201223	0.0205249
ME	language	INVW	5e-05	rs143473687	0.0459451	0.0201133	0.0223532
ME	language	INVW	5e-05	rs146845996	0.0444468	0.0202015	0.0277949
ME	language	INVW	5e-05	rs146880209	0.0438743	0.020223	0.030043
ME	language	INVW	5e-05	rs146931802	0.0419368	0.0200792	0.0367467
ME	language	INVW	5e-05	rs147956836	0.0434847	0.0202037	0.0313727
ME	language	INVW	5e-05	rs1529404	0.0451305	0.0202019	0.0254848
ME	language	INVW	5e-05	rs16833234	0.0469481	0.0200651	0.0192944
ME	language	INVW	5e-05	rs17366088	0.0426124	0.0201597	0.0345372
ME	language	INVW	5e-05	rs2139783	0.0413658	0.0200179	0.0387865
ME	language	INVW	5e-05	rs2765233	0.0451866	0.0202269	0.0254842
ME	language	INVW	5e-05	rs2879134	0.0408472	0.0199387	0.0404979
ME	language	INVW	5e-05	rs294781	0.0445392	0.0202321	0.0277067
ME	language	INVW	5e-05	rs34346801	0.0464201	0.0200944	0.0208821
ME	language	INVW	5e-05	rs35448821	0.0462074	0.0201436	0.0217963
ME	language	INVW	5e-05	rs361742	0.0456852	0.0201806	0.0235851
ME	language	INVW	5e-05	rs3740563	0.0478712	0.0198908	0.016097
ME	language	INVW	5e-05	rs3805476	0.0445502	0.0202929	0.0281375
ME	language	INVW	5e-05	rs3898946	0.0456425	0.0201906	0.0237851
ME	language	INVW	5e-05	rs41873	0.043094	0.0201838	0.0327547
ME	language	INVW	5e-05	rs4312581	0.0429636	0.0201859	0.0333042
ME	language	INVW	5e-05	rs4572341	0.0421962	0.0201573	0.0363187
ME	language	INVW	5e-05	rs4722155	0.0447251	0.0202228	0.0269935
ME	language	INVW	5e-05	rs4940732	0.0471302	0.0200176	0.0185506
ME	language	INVW	5e-05	rs4945445	0.041197	0.019967	0.0390888
ME	language	INVW	5e-05	rs539674	0.0485032	0.0198305	0.0144494
ME	language	INVW	5e-05	rs55701468	0.0429449	0.0201948	0.033459
ME	language	INVW	5e-05	rs57482675	0.0437133	0.0202272	0.030686
ME	language	INVW	5e-05	rs59187081	0.0407854	0.0199085	0.040497
ME	language	INVW	5e-05	rs6124907	0.0426213	0.0201869	0.0347434
ME	language	INVW	5e-05	rs61647450	0.0436432	0.0202251	0.0309375
ME	language	INVW	5e-05	rs61774392	0.0476948	0.0198157	0.0160878
ME	language	INVW	5e-05	rs62520433	0.0401796	0.0197726	0.0421447
ME	language	INVW	5e-05	rs6591217	0.0443446	0.0202291	0.0283707
ME	language	INVW	5e-05	rs6672634	0.0469422	0.0200781	0.0193883
ME	language	INVW	5e-05	rs6727937	0.0443463	0.020234	0.0284031
ME	language	INVW	5e-05	rs6739228	0.0421002	0.0201341	0.0365291
ME	language	INVW	5e-05	rs6807224	0.0450571	0.020237	0.0259827
ME	language	INVW	5e-05	rs6901468	0.0463576	0.0201104	0.0211576
ME	language	INVW	5e-05	rs6904638	0.0495514	0.0196487	0.0116734
ME	language	INVW	5e-05	rs7093729	0.0431024	0.0201991	0.0328526
ME	language	INVW	5e-05	rs71621979	0.0456668	0.0202971	0.0244539
ME	language	INVW	5e-05	rs7223476	0.0423077	0.0201077	0.0353736
ME	language	INVW	5e-05	rs72675335	0.0426202	0.0200918	0.0338992
ME	language	INVW	5e-05	rs72784378	0.0441912	0.0202178	0.0288332
ME	language	INVW	5e-05	rs7322542	0.0432187	0.0202154	0.0325238
ME	language	INVW	5e-05	rs73380329	0.04401	0.0202279	0.0295773
ME	language	INVW	5e-05	rs734082	0.0447065	0.0202251	0.0270743
ME	language	INVW	5e-05	rs74155841	0.0454641	0.0201992	0.0243991
ME	language	INVW	5e-05	rs74379781	0.0437137	0.020222	0.0306426
ME	language	INVW	5e-05	rs75507123	0.0442113	0.0202318	0.0288715
ME	language	INVW	5e-05	rs7554669	0.0445973	0.0203093	0.0280988
ME	language	INVW	5e-05	rs76195952	0.043038	0.0201728	0.032886
ME	language	INVW	5e-05	rs77733833	0.0480905	0.0197507	0.0148969
ME	language	INVW	5e-05	rs799455	0.0467719	0.0200594	0.0197181
ME	language	INVW	5e-05	rs80055245	0.0449497	0.0202677	0.0265688
ME	language	INVW	5e-05	rs8191416	0.044282	0.0202173	0.0285026
ME	language	INVW	5e-05	rs9520594	0.0449477	0.0202132	0.0261697
ME	language	INVW	5e-05	rs9647401	0.0468428	0.0201368	0.0200065
ME	language	INVW	5e-05	rs9824424	0.0431245	0.0201739	0.0325458
ME	language	INVW	5e-05	All	0.0443171	0.0199977	0.0266837
ME	language	MR-egger	5e-06	rs10044788	-0.143669	0.159722	0.403044
ME	language	MR-egger	5e-06	rs114029967	-0.194097	0.174413	0.308355
ME	language	MR-egger	5e-06	rs117450000	-0.104484	0.155813	0.527448
ME	language	MR-egger	5e-06	rs12729624	-0.0722723	0.139963	0.624069
ME	language	MR-egger	5e-06	rs3805476	-0.141522	0.146434	0.37114
ME	language	MR-egger	5e-06	rs6124907	-0.134842	0.15831	0.427031
ME	language	MR-egger	5e-06	rs7554669	-0.142117	0.146085	0.368205
ME	language	MR-egger	5e-06	rs80055245	-0.167159	0.168265	0.358861
ME	language	MR-egger	5e-06	rs9647401	-0.180082	0.138189	0.240294
ME	language	MR-egger	5e-06	All	-0.141371	0.136716	0.335509
ME	language	MR-egger	5e-05	rs10044788	0.00172631	0.0489274	0.971939
ME	language	MR-egger	5e-05	rs10518914	-0.00344272	0.0478621	0.942831
ME	language	MR-egger	5e-05	rs11182656	0.00517574	0.0484876	0.91525
ME	language	MR-egger	5e-05	rs111850655	-0.0108903	0.0481236	0.821525
ME	language	MR-egger	5e-05	rs112279425	0.000219272	0.0482928	0.996388
ME	language	MR-egger	5e-05	rs113114385	-0.00621945	0.0489156	0.899132
ME	language	MR-egger	5e-05	rs114029967	0.000556906	0.0493639	0.991026
ME	language	MR-egger	5e-05	rs114671798	-0.000268248	0.048836	0.995631
ME	language	MR-egger	5e-05	rs114728400	-0.000274632	0.0482431	0.995472
ME	language	MR-egger	5e-05	rs115067899	0.0018225	0.0490024	0.970421
ME	language	MR-egger	5e-05	rs115618389	0.00527932	0.0490026	0.914466
ME	language	MR-egger	5e-05	rs11599214	0.000392069	0.0483866	0.993554
ME	language	MR-egger	5e-05	rs116272295	0.00985262	0.0485836	0.83979
ME	language	MR-egger	5e-05	rs116836168	-0.0152559	0.0471483	0.747075
ME	language	MR-egger	5e-05	rs117350699	0.00640413	0.0485962	0.895475
ME	language	MR-egger	5e-05	rs117450000	0.00595304	0.0487241	0.903053
ME	language	MR-egger	5e-05	rs117467003	0.00556939	0.0487675	0.909353
ME	language	MR-egger	5e-05	rs117693140	-0.0090255	0.0483874	0.852488
ME	language	MR-egger	5e-05	rs118116932	0.00842732	0.0480604	0.861233
ME	language	MR-egger	5e-05	rs11819822	0.00221142	0.0484109	0.963675
ME	language	MR-egger	5e-05	rs12498129	0.00328931	0.0480788	0.94562
ME	language	MR-egger	5e-05	rs12691510	0.00243058	0.0484623	0.96012
ME	language	MR-egger	5e-05	rs12729624	0.00147725	0.0470248	0.975015
ME	language	MR-egger	5e-05	rs12830744	0.00583188	0.0483906	0.904365
ME	language	MR-egger	5e-05	rs138653681	0.00594957	0.0487441	0.903149
ME	language	MR-egger	5e-05	rs139634777	-0.00750206	0.048655	0.877835
ME	language	MR-egger	5e-05	rs140373307	0.00702868	0.0487737	0.885765
ME	language	MR-egger	5e-05	rs143473687	0.00566673	0.0487899	0.907818
ME	language	MR-egger	5e-05	rs146845996	-0.000233151	0.0489866	0.996214
ME	language	MR-egger	5e-05	rs146880209	-0.00181153	0.0488181	0.970488
ME	language	MR-egger	5e-05	rs146931802	-0.00546231	0.0482412	0.910122
ME	language	MR-egger	5e-05	rs147956836	-0.00429038	0.0490191	0.930465
ME	language	MR-egger	5e-05	rs1529404	-0.00219967	0.048521	0.96395
ME	language	MR-egger	5e-05	rs16833234	-0.000730114	0.0479498	0.987888
ME	language	MR-egger	5e-05	rs17366088	-0.00242868	0.0483289	0.960041
ME	language	MR-egger	5e-05	rs2139783	-0.00721017	0.0481028	0.881214
ME	language	MR-egger	5e-05	rs2765233	-0.00100436	0.0484019	0.983494
ME	language	MR-egger	5e-05	rs2879134	0.00417542	0.0478544	0.930681
ME	language	MR-egger	5e-05	rs294781	0.000314182	0.0484139	0.994838
ME	language	MR-egger	5e-05	rs34346801	0.00579469	0.0485163	0.905217
ME	language	MR-egger	5e-05	rs35448821	0.00592013	0.0488431	0.90382
ME	language	MR-egger	5e-05	rs361742	0.00149517	0.0483326	0.975396
ME	language	MR-egger	5e-05	rs3740563	0.00301491	0.0476104	0.94966
ME	language	MR-egger	5e-05	rs3805476	0.000417241	0.0484618	0.993151
ME	language	MR-egger	5e-05	rs3898946	-0.00314149	0.048438	0.948445
ME	language	MR-egger	5e-05	rs41873	0.00260424	0.0487105	0.957491
ME	language	MR-egger	5e-05	rs4312581	0.00026839	0.0483154	0.995581
ME	language	MR-egger	5e-05	rs4572341	-0.00263888	0.0482653	0.956529
ME	language	MR-egger	5e-05	rs4722155	-0.00177346	0.0486691	0.97102
ME	language	MR-egger	5e-05	rs4940732	-0.00840841	0.0480582	0.861535
ME	language	MR-egger	5e-05	rs4945445	0.00753658	0.0482217	0.876184
ME	language	MR-egger	5e-05	rs539674	-0.00449346	0.0473349	0.9246
ME	language	MR-egger	5e-05	rs55701468	-0.00250199	0.0484587	0.958946
ME	language	MR-egger	5e-05	rs57482675	-0.0029527	0.0489876	0.952082
ME	language	MR-egger	5e-05	rs59187081	0.00515869	0.047839	0.914387
ME	language	MR-egger	5e-05	rs6124907	0.00163095	0.0483503	0.973172
ME	language	MR-egger	5e-05	rs61647450	0.000685566	0.0484585	0.988746
ME	language	MR-egger	5e-05	rs61774392	0.0119283	0.0480628	0.804607
ME	language	MR-egger	5e-05	rs62520433	-0.0130976	0.0475985	0.78387
ME	language	MR-egger	5e-05	rs6591217	-0.000515403	0.0486028	0.991565
ME	language	MR-egger	5e-05	rs6672634	0.00176366	0.0480167	0.970788
ME	language	MR-egger	5e-05	rs6727937	0.000208191	0.0484808	0.996584
ME	language	MR-egger	5e-05	rs6739228	0.00102344	0.0481855	0.983106
ME	language	MR-egger	5e-05	rs6807224	0.00137554	0.0485775	0.977478
ME	language	MR-egger	5e-05	rs6901468	-0.0056674	0.0482876	0.906852
ME	language	MR-egger	5e-05	rs6904638	-0.00112137	0.046853	0.980963
ME	language	MR-egger	5e-05	rs7093729	0.00190815	0.0485363	0.968735
ME	language	MR-egger	5e-05	rs71621979	0.00252806	0.0487104	0.958733
ME	language	MR-egger	5e-05	rs7223476	0.0047418	0.0485378	0.922412
ME	language	MR-egger	5e-05	rs72675335	-0.00471257	0.0483559	0.922599
ME	language	MR-egger	5e-05	rs72784378	-0.000634423	0.0487399	0.989646
ME	language	MR-egger	5e-05	rs7322542	-0.00142437	0.0484422	0.976613
ME	language	MR-egger	5e-05	rs73380329	0.000281368	0.0484261	0.995378
ME	language	MR-egger	5e-05	rs734082	-0.00160489	0.0486465	0.973761
ME	language	MR-egger	5e-05	rs74155841	0.00309379	0.0488296	0.949633
ME	language	MR-egger	5e-05	rs74379781	-0.00200218	0.0487393	0.967331
ME	language	MR-egger	5e-05	rs75507123	0.000191746	0.048414	0.996849
ME	language	MR-egger	5e-05	rs7554669	0.000451704	0.0484597	0.992585
ME	language	MR-egger	5e-05	rs76195952	-0.00425282	0.0486484	0.930549
ME	language	MR-egger	5e-05	rs77733833	0.0122089	0.0478272	0.799145
ME	language	MR-egger	5e-05	rs799455	-0.00586669	0.0480976	0.903214
ME	language	MR-egger	5e-05	rs80055245	0.00117338	0.0491882	0.981026
ME	language	MR-egger	5e-05	rs8191416	-0.00101054	0.0490523	0.983613
ME	language	MR-egger	5e-05	rs9520594	-0.00263112	0.0486878	0.957033
ME	language	MR-egger	5e-05	rs9647401	0.000370003	0.0480675	0.993877
ME	language	MR-egger	5e-05	rs9824424	-0.00157018	0.0483864	0.97419
ME	language	MR-egger	5e-05	All	0.000198298	0.048122	0.996722
language	ME	INVW	5e-06	rs1025368	0.0442617	0.0651677	0.497013
language	ME	INVW	5e-06	rs114934413	0.0323773	0.0623289	0.60344
language	ME	INVW	5e-06	rs117139399	0.0605409	0.0646858	0.349313
language	ME	INVW	5e-06	rs1200353	0.0598129	0.0646642	0.354978
language	ME	INVW	5e-06	rs12089942	0.0649908	0.063565	0.306577
language	ME	INVW	5e-06	rs12623487	0.0323795	0.0624333	0.604022
language	ME	INVW	5e-06	rs12919492	0.0636762	0.0635196	0.316119
language	ME	INVW	5e-06	rs12974767	0.0731537	0.0602437	0.224635
language	ME	INVW	5e-06	rs13149159	0.0324982	0.0623164	0.602016
language	ME	INVW	5e-06	rs1580937	0.0474901	0.0652597	0.466791
language	ME	INVW	5e-06	rs28413816	0.0428166	0.0653989	0.512662
language	ME	INVW	5e-06	rs322772	0.0593197	0.064588	0.358393
language	ME	INVW	5e-06	rs3812257	0.0447714	0.0651948	0.492251
language	ME	INVW	5e-06	rs420709	0.0593308	0.0647453	0.359471
language	ME	INVW	5e-06	rs466081	0.055177	0.0649803	0.395807
language	ME	INVW	5e-06	rs4781176	0.0525015	0.0652405	0.420971
language	ME	INVW	5e-06	rs4813006	0.0267747	0.0604333	0.657732
language	ME	INVW	5e-06	rs6125571	0.047106	0.0655506	0.472375
language	ME	INVW	5e-06	rs6443281	0.0470678	0.0653484	0.471365
language	ME	INVW	5e-06	rs6661669	0.0459455	0.0653373	0.481928
language	ME	INVW	5e-06	rs68093531	0.0286118	0.0612058	0.640165
language	ME	INVW	5e-06	rs7149112	0.060891	0.0644185	0.344536
language	ME	INVW	5e-06	rs72637793	0.0481434	0.0653153	0.461066
language	ME	INVW	5e-06	rs73220474	0.058336	0.065165	0.370678
language	ME	INVW	5e-06	rs74694561	0.0515523	0.0655215	0.431399
language	ME	INVW	5e-06	rs852391	0.0569284	0.064982	0.380995
language	ME	INVW	5e-06	rs9375195	0.0456476	0.0650824	0.483065
language	ME	INVW	5e-06	rs9569907	0.064304	0.0635838	0.31186
language	ME	INVW	5e-06	All	0.050229	0.0630102	0.42536
language	ME	MR-egger	5e-06	rs1025368	0.3229	0.215296	0.146191
language	ME	MR-egger	5e-06	rs114934413	0.222649	0.219643	0.320442
language	ME	MR-egger	5e-06	rs117139399	0.448454	0.228989	0.0614291
language	ME	MR-egger	5e-06	rs1200353	0.300768	0.214814	0.173763
language	ME	MR-egger	5e-06	rs12089942	0.300104	0.211149	0.167587
language	ME	MR-egger	5e-06	rs12623487	0.326384	0.204293	0.12269
language	ME	MR-egger	5e-06	rs12919492	0.321056	0.210522	0.139799
language	ME	MR-egger	5e-06	rs12974767	0.276274	0.201991	0.183559
language	ME	MR-egger	5e-06	rs13149159	0.259042	0.210313	0.229524
language	ME	MR-egger	5e-06	rs1580937	0.311324	0.224617	0.177981
language	ME	MR-egger	5e-06	rs28413816	0.305389	0.214834	0.167524
language	ME	MR-egger	5e-06	rs322772	0.291867	0.217233	0.191157
language	ME	MR-egger	5e-06	rs3812257	0.320584	0.215415	0.149199
language	ME	MR-egger	5e-06	rs420709	0.309957	0.214306	0.160506
language	ME	MR-egger	5e-06	rs466081	0.309634	0.215656	0.163461
language	ME	MR-egger	5e-06	rs4781176	0.307584	0.216962	0.168626
language	ME	MR-egger	5e-06	rs4813006	0.186682	0.214794	0.393049
language	ME	MR-egger	5e-06	rs6125571	0.312656	0.215972	0.160135
language	ME	MR-egger	5e-06	rs6443281	0.31895	0.216553	0.153271
language	ME	MR-egger	5e-06	rs6661669	0.317402	0.215827	0.153866
language	ME	MR-egger	5e-06	rs68093531	0.258479	0.205097	0.219206
language	ME	MR-egger	5e-06	rs7149112	0.292179	0.21556	0.187397
language	ME	MR-egger	5e-06	rs72637793	0.361077	0.246141	0.154857
language	ME	MR-egger	5e-06	rs73220474	0.423049	0.231309	0.0793636
language	ME	MR-egger	5e-06	rs74694561	0.309071	0.216571	0.165919
language	ME	MR-egger	5e-06	rs852391	0.309287	0.215235	0.163123
language	ME	MR-egger	5e-06	rs9375195	0.331531	0.216963	0.139054
language	ME	MR-egger	5e-06	rs9569907	0.303764	0.211118	0.162599
language	ME	MR-egger	5e-06	All	0.307968	0.212094	0.158453

[truncated: 1 more sheets: AppendixA-SFile1_FUMA_parameter]
